# Supplementary material for: Regression Models Augmented with Direct Stochastic Gradient Estimators
Source: Atypon-hosted journal article supplement (doi:10.1287/ijoc.2013.0579), 2014-04-11
Supplement: ijoc.2013.0579-sm.pdf [file ijoc.2013.0579-sm.pdf]

## e-companion

### EC.1. Derivation Details

#### Unbiasedness and Variances of DiGAR Least-Squares Estimators

The unweighted OLS case is considered here, as the extension to weights  $\alpha$  is similar (basically insert  $\frac{1-\alpha}{\alpha}$  in last terms of both numerator and denominator at beginning of derivations). The parameter estimators given by (7) are unbiased, since

$$E[\hat{\beta}_1] = \frac{\sum_{i=1}^n x_i E[y_i] - n\bar{x}E[\bar{y}] + nE[\bar{g}]}{\sum_{i=1}^n x_i^2 - n\bar{x}^2 + n} = \beta_1,$$

$$E[\hat{\beta}_0] = E[\bar{y}] - E[\hat{\beta}_1]\bar{x} = \beta_0,$$

and the variances of these two estimators are calculated as follows:

$$\begin{aligned} \text{Var}(\hat{\beta}_1) &= \frac{\sum_{i=1}^n x_i^2 \text{Var}(y_i) - n^2 \bar{x}^2 \text{Var}(\bar{y}) + n^2 \text{Var}(\bar{g})}{\left(\sum_{i=1}^n x_i^2 - n\bar{x}^2 + n\right)^2} \\ &= \frac{\sum_{i=1}^n x_i^2 \sigma^2 - n^2 \bar{x}^2 \sigma^2 / n + n^2 \sigma_g^2 / n}{\left(\sum_{i=1}^n x_i^2 - n\bar{x}^2 + n\right)^2} \\ &= \frac{\left(\sum_{i=1}^n x_i^2 - n\bar{x}^2\right) \sigma^2 + n\sigma_g^2}{\left(\sum_{i=1}^n x_i^2 - n\bar{x}^2 + n\right)^2}, \\ \text{Var}(\hat{\beta}_0) &= \text{Var}(\bar{y}) + \bar{x}^2 \text{Var}\hat{\beta}_1 \\ &= \frac{\sigma^2}{n} + \bar{x}^2 \frac{\left(\sum_{i=1}^n x_i^2 - n\bar{x}^2\right) \sigma^2 + n\sigma_g^2}{\left(\sum_{i=1}^n x_i^2 - n\bar{x}^2 + n\right)^2} \\ &= \sigma^2 \left( \frac{1}{n} + \frac{\bar{x}^2 \left(\sum_{i=1}^n x_i^2 - n\bar{x}^2\right)}{\left(\sum_{i=1}^n x_i^2 - n\bar{x}^2 + n\right)^2} \right) + \sigma_g^2 \left( \frac{n\bar{x}^2}{\left(\sum_{i=1}^n x_i^2 - n\bar{x}^2 + n\right)^2} \right). \end{aligned}$$

### Proof of Proposition 4

Comparing the variances given by (12) and (14), the inequality holds if and only if

$$\begin{aligned} \frac{\sigma^2 \frac{1}{n} \sum_{i=1}^n (x_i - \bar{x})^2 + \left(\frac{1-\alpha}{\alpha}\right)^2 \frac{\sigma_g^2}{\sigma^2}}{n \left( \frac{1}{n} \sum_{i=1}^n (x_i - \bar{x})^2 + \frac{1-\alpha}{\alpha} \right)^2} &\leq \frac{\sigma^2}{n \frac{1}{n} \sum_{i=1}^n (x_i - \bar{x})^2} \\ \Leftrightarrow \left(\frac{\sigma_g}{\sigma}\right)^2 &\leq \left(\frac{\alpha}{1-\alpha}\right)^2 \left( \frac{\left( \frac{1}{n} \sum_{i=1}^n (x_i - \bar{x})^2 + \frac{1-\alpha}{\alpha} \right)^2}{\frac{1}{n} \sum_{i=1}^n (x_i - \bar{x})^2} - \frac{1}{n} \sum_{i=1}^n (x_i - \bar{x})^2 \right) \\ &= 2 \left(\frac{\alpha}{1-\alpha}\right) + \frac{1}{\frac{1}{n} \sum_{i=1}^n (x_i - \bar{x})^2} \end{aligned}$$

### Unbiasedness and Variances of DiGAR MLEs

Under the normality assumption, the respective probability density functions for  $y_i$  and  $g_i$  are given by

$$\begin{aligned} f(y_i; \beta_0, \beta_1, \sigma^2) &= \frac{1}{\sqrt{2\pi}\sigma} \exp \left\{ -\frac{(y_i - \beta_0 - \beta_1 x_i)^2}{2\sigma^2} \right\}, \\ f(g_i; \beta_1, \sigma_g^2) &= \frac{1}{\sqrt{2\pi}\sigma_g} \exp \left\{ -\frac{(g_i - \beta_1)^2}{2\sigma_g^2} \right\}. \end{aligned}$$

Since they are mutually independent, the likelihood function is simply the product given by

$$L(\beta_0, \beta_1, \sigma^2, \sigma_g^2) = (2\pi)^{-n} \sigma^{-n} \sigma_g^{-n} \exp \left\{ -\frac{1}{2\sigma^2} \sum_{i=1}^n (y_i - \beta_0 - \beta_1 x_i)^2 - \frac{1}{2\sigma_g^2} \sum_{i=1}^n (g_i - \beta_1)^2 \right\},$$

and the log-likelihood function is

$$\log(L) = -n \ln(2\pi\sigma\sigma_g) - \frac{1}{2\sigma^2} \sum_{i=1}^n (y_i - \beta_0 - \beta_1 x_i)^2 - \frac{1}{2\sigma_g^2} \sum_{i=1}^n (g_i - \beta_1)^2.$$

Differentiating the log-likelihood function with respect to the parameters,

$$\begin{aligned} \frac{\partial \log(L)}{\partial \beta_1} &= \frac{1}{\sigma^2} \sum_{i=1}^n (y_i - \beta_0 - \beta_1 x_i) x_i + \frac{1}{\sigma_g^2} \sum_{i=1}^n (g_i - \beta_1), \\ \frac{\partial \log(L)}{\partial \beta_0} &= \frac{1}{\sigma^2} \sum_{i=1}^n (y_i - \beta_0 - \beta_1 x_i), \\ \frac{\partial \log(L)}{\partial \sigma^2} &= -\frac{n}{2\sigma^2} + \frac{1}{2\sigma^4} \sum_{i=1}^n (y_i - \beta_0 - \beta_1 x_i)^2, \\ \frac{\partial \log(L)}{\partial \sigma_g^2} &= -\frac{n}{2\sigma_g^2} + \frac{1}{2\sigma_g^4} \sum_{i=1}^n (g_i - \beta_1)^2. \end{aligned}$$

Setting each derivative equal to 0 and solving for the estimators yields

$$\hat{\beta}_1 = \frac{\sum_{i=1}^n x_i y_i / \sigma^2 + n \bar{g} / \sigma_g^2 - n \bar{x} \bar{y} / \sigma^2}{\sum_{i=1}^n x_i^2 / \sigma^2 + n / \sigma_g^2 - n \bar{x}^2 / \sigma^2}, \quad (\text{EC.1})$$

$$\hat{\beta}_0 = \bar{y} - \hat{\beta}_1 \bar{x}.$$

Since  $\sigma^2$  and  $\sigma_g^2$  are unknown, they must be estimated from the sample variances,

$$\hat{\sigma}_1^2 = \frac{1}{n-1} \sum_{i=1}^n (y_i - \bar{y})^2, \quad \hat{\sigma}_2^2 = \frac{1}{n-1} \sum_{i=1}^n (g_i - \bar{g})^2,$$

which must be substituted for  $\sigma^2$  and  $\sigma_g^2$  in (EC.1).

### Proof of BLUE in Correlated DiGAR Model

The proof uses the Gauss-Markov Theorem.

**THEOREM EC.1 (Gauss-Markov Theorem).** *For the regression model (24) with  $E[\boldsymbol{\epsilon}] = \mathbf{0}$  and  $\text{Cov}(\boldsymbol{\epsilon}) = \sigma^2 \mathbf{I}$ , the OLS estimators have minimum variance among all linear unbiased estimators.*

Since  $\mathbf{V}$  is positive definite, there exists an  $2n \times 2n$  nonsingular matrix  $\mathbf{P}$  such that  $\mathbf{V} = \mathbf{P}\mathbf{P}'$ . Multiplying  $\mathbf{y} = \mathbf{X}\boldsymbol{\beta} + \boldsymbol{\epsilon}$  by  $\mathbf{P}^{-1}$ , we obtain

$$\mathbf{P}^{-1}\mathbf{y} = \mathbf{P}^{-1}\mathbf{X}\boldsymbol{\beta} + \mathbf{P}^{-1}\boldsymbol{\epsilon},$$

where  $E[\mathbf{P}^{-1}\boldsymbol{\epsilon}] = \mathbf{P}^{-1}E[\boldsymbol{\epsilon}] = \mathbf{0}$  and

$$\text{Cov}(\mathbf{P}^{-1}\boldsymbol{\epsilon}) = \mathbf{P}^{-1}\text{Cov}(\boldsymbol{\epsilon}(\mathbf{P}^{-1})') = \mathbf{P}^{-1}\sigma^2\mathbf{V}(\mathbf{P}^{-1})' = \sigma^2\mathbf{P}^{-1}\mathbf{P}\mathbf{P}'(\mathbf{P}')^{-1} = \sigma^2\mathbf{I}.$$

Therefore, the assumptions in the Gauss-Markov Theorem are satisfied, and the least-squares estimator

$$\hat{\boldsymbol{\beta}} = [(\mathbf{P}^{-1}\mathbf{X})'(\mathbf{P}^{-1}\mathbf{X})]^{-1}(\mathbf{P}^{-1}\mathbf{X})'\mathbf{P}^{-1}\mathbf{y},$$

is the best linear unbiased estimator (BLUE). The estimator  $\hat{\boldsymbol{\beta}}$  can be written as

$$\begin{aligned} \hat{\boldsymbol{\beta}} &= [(\mathbf{P}^{-1}\mathbf{X})'(\mathbf{P}^{-1}\mathbf{X})]^{-1}(\mathbf{P}^{-1}\mathbf{X})'\mathbf{P}^{-1}\mathbf{y} \\ &= [\mathbf{X}'(\mathbf{P}')^{-1}\mathbf{P}^{-1}\mathbf{X}]^{-1}\mathbf{X}'(\mathbf{P}')^{-1}\mathbf{P}^{-1}\mathbf{y} \\ &= [\mathbf{X}'(\mathbf{P}\mathbf{P}')^{-1}\mathbf{X}]^{-1}\mathbf{X}'(\mathbf{P}\mathbf{P}')^{-1}\mathbf{y} \\ &= (\mathbf{X}'\mathbf{V}^{-1}\mathbf{X})^{-1}\mathbf{X}'\mathbf{V}^{-1}\mathbf{y}. \end{aligned}$$

### Correlated DiGAR MLE

If the residuals are normally distributed, i.e.,  $\boldsymbol{\epsilon} \sim \mathcal{N}(0, \mathbf{V})$ , then  $\mathbf{y} \sim \mathcal{N}(\mathbf{X}\boldsymbol{\beta}, \mathbf{V})$ , and the likelihood function is

$$L(\boldsymbol{\beta}) = \frac{1}{(2\pi)^n |\mathbf{V}|^{1/2}} \exp \left\{ -(\mathbf{y} - \mathbf{X}\boldsymbol{\beta})'(\mathbf{V})^{-1}(\mathbf{y} - \mathbf{X}\boldsymbol{\beta})/2 \right\},$$

so the log-likelihood function is

$$\ln L(\boldsymbol{\beta}) = -n \ln(2\pi) - \frac{1}{2} \ln(|\mathbf{V}|) - \frac{1}{2} (\mathbf{y} - \mathbf{X}\boldsymbol{\beta})' \mathbf{V}^{-1} (\mathbf{y} - \mathbf{X}\boldsymbol{\beta}).$$

Differentiating with respect to  $\boldsymbol{\beta}$ ,

$$\frac{\partial \ln L}{\partial \boldsymbol{\beta}} = -(\mathbf{X}' \mathbf{V} \mathbf{X} \boldsymbol{\beta} - \mathbf{X}' \mathbf{V}^{-1} \mathbf{y}),$$

setting equal to zero and solving for  $\boldsymbol{\beta}$  gives the estimator

$$\hat{\boldsymbol{\beta}} = (\mathbf{X}' \mathbf{V}^{-1} \mathbf{y})^{-1} \mathbf{X}' \mathbf{V}^{-1} \mathbf{y},$$

which is the same as the best linear unbiased estimator (BLUE).

### OLS Estimators in Quadratic DiGAR

Consider the loss function

$$L = \frac{1}{2} \sum_{i=1}^n (y_i - \beta_2 x_i^2 - \beta_1 x_i - \beta_0)^2 + \frac{1}{2} \sum_{i=1}^n (g_i - 2\beta_2 x_i - \beta_1)^2$$

Differentiating with respect to  $\beta_0, \beta_1, \beta_2$ ,

$$\begin{aligned} \frac{\partial L}{\partial \beta_0} &= - \sum_{i=1}^n (y_i - \beta_2 x_i^2 - \beta_1 x_i - \beta_0) \\ \frac{\partial L}{\partial \beta_1} &= - \sum_{i=1}^n (y_i - \beta_2 x_i^2 - \beta_1 x_i - \beta_0) x_i - \sum_{i=1}^n (g_i - 2\beta_2 x_i - \beta_1) \\ \frac{\partial L}{\partial \beta_2} &= - \sum_{i=1}^n (y_i - \beta_2 x_i^2 - \beta_1 x_i - \beta_0) x_i^2 - \sum_{i=1}^n (g_i - 2\beta_2 x_i - \beta_1) 2x_i \end{aligned} \tag{EC.2}$$

Setting them equal to 0 and solving yields the following estimators,  $\boldsymbol{\beta} = \mathbf{A}\mathbf{y}$ , where

$$\boldsymbol{\beta} \equiv [\beta_0, \beta_1, \beta_2]^T, \quad \mathbf{y} = \left[ \sum_{i=1}^n x_i^2 y_i + 2 \sum_{i=1}^n x_i g_i, \sum_{i=1}^n x_i y_i + \sum_{i=1}^n g_i, \sum_{i=1}^n y_i \right]^T,$$

and

$$\mathbf{A} = \frac{1}{abc - af^2 - be^2 - cd^2 + 2def} \begin{bmatrix} bc - f^2 & ef - cd & df - be \\ ef - cd & ac - e^2 & de - af \\ df - be & de - af & ab - d^2 \end{bmatrix},$$

with  $a = \sum_{i=1}^n x_i^4 + 4 \sum_{i=1}^n x_i^2$ ,  $b = \sum_{i=1}^n x_i^2$ ,  $c = n$ ,  $d = \sum_{i=1}^n x_i^3 + 2 \sum_{i=1}^n x_i$ ,  $e = \sum_{i=1}^n x_i^2$ ,  $f = \sum_{i=1}^n x_i$ .

## EC.2. Gradient Estimation for $G/G/1$ Queue

Let  $A_k$  be the interarrival time between the  $(k-1)$ st and  $k$ th customer (by convention, taking  $A_1$  to be the time of the 1st arrival), and let  $X_k$  be the service time of the  $k$ th customer. The system time of the  $k$ th customer, denoted by  $T_k$ , satisfies the well-known Lindley equation:

$$T_{k+1} = X_{k+1} + (T_k - A_{k+1})^+, \quad (\text{EC.3})$$

where  $a^+ = \max(a, 0)$ . The infinitesimal perturbation analysis (IPA) estimator is then obtained by simple differentiation, which for a general parameter  $\theta$  is given by ((Suri and Zazanis 1988)):

$$\frac{dT_{k+1}}{d\theta} = \frac{dX_{k+1}}{d\theta} + \left( \frac{dT_k}{d\theta} - \frac{dA_{k+1}}{d\theta} \right) \mathbf{1}\{T_k \geq A_{k+1}\}, \quad k > 1, \quad \text{with} \quad \frac{dT_1}{d\theta} = \frac{dX_1}{d\theta}. \quad (\text{EC.4})$$

For  $x$  a parameter of the (common) customer service time distribution, the unbiased IPA estimator is

$$\frac{dT_{k+1}}{dx} = \frac{dX_{k+1}}{dx} + \frac{dT_k}{dx} \mathbf{1}\{T_k \geq A_{k+1}\},$$

where  $dX/dx$  can be calculated based on the distribution for the random variable  $X$ . For example, if  $X$  is exponentially distributed (with mean  $x$ ), then  $dX/dx$  is simply given by  $X/x$ , and (EC.2) becomes

$$\frac{dT_{k+1}}{dx} = \frac{X_{k+1}}{x} + \frac{dT_k}{dx} \mathbf{1}\{T_k \geq A_{k+1}\}, \quad k > 1, \quad \text{with} \quad \frac{dT_1}{dx} = \frac{X_1}{x},$$

the latter assuming that the system starts empty. This is what is used for the  $M/M/1$  queue example.

Similarly, for the  $U/U/1$  example, where the interarrival time and service time distributions are  $U(\theta_1 - \delta_1, \theta_1 + \delta_1) U(\theta_2 - \delta_2, \theta_2 + \delta_2)$ , respectively, the four unbiased IPA estimators are

$$\begin{aligned}\frac{\partial T_{k+1}}{\partial \theta_1} &= \left( \frac{\partial T_k}{\partial \theta_1} - 1 \right) 1\{T_k \geq A_{k+1}\}, \quad k > 1, \quad \text{with } \frac{\partial T_1}{\partial \theta_1} = 0, \\ \frac{\partial T_{k+1}}{\partial \theta_2} &= 1 + \frac{\partial T_k}{\partial \theta_2} 1\{T_k \geq A_{k+1}\}, \quad k > 1, \quad \text{with } \frac{\partial T_1}{\partial \theta_2} = 1, \\ \frac{\partial T_{k+1}}{\partial \delta_1} &= \left( \frac{\partial T_k}{\partial \delta_1} - \frac{A_{k+1} - \theta_1}{\delta_1} \right) 1\{T_k \geq A_{k+1}\}, \quad k > 1, \quad \text{with } \frac{\partial T_1}{\partial \delta_1} = 0, \\ \frac{\partial T_{k+1}}{\partial \delta_2} &= \frac{X_{k+1} - \theta_2}{\delta_2} + \frac{\partial T_k}{\partial \delta_2} 1\{T_k \geq A_{k+1}\}, \quad k > 1, \quad \text{with } \frac{\partial T_1}{\partial \delta_2} = \frac{X_1 - \theta_2}{\delta_2},\end{aligned}$$

### EC.3. Analytical Results for $M/M/1$ and $U/U/1$ Queues

For the  $M/M/1$  queue, the true models for an interarrival mean of 0.2 are given by

$$\begin{aligned}y^{(2)}(x) &= x + \frac{x^2}{5+x}, \\ y^{(3)}(x) &= x + \frac{5x^2}{(5+x)^2} + \frac{x^3(15+2x)}{(5+x)^3}, \\ y^{(4)}(x) &= x + \frac{25x^2}{(5+x)^3} + \frac{25x^3}{(5+x)^4} + \frac{5x^3(15+2x)}{(5+x)^4} + \frac{x^4(225+50x+3x^2)}{(5+x)^5}, \\ y^{(5)}(x) &= x + \frac{125x^2}{(5+x)^4} + \frac{250x^3}{(5+x)^5} + \frac{25x^3(15+2x)}{(5+x)^5} + \frac{5x^4(225+50x+3x^2)}{(5+x)^6} \\ &\quad + \frac{25x^4(15+2x)}{(5+x)^6} + \frac{250x^4}{(5+x)^6} + \frac{x^5(10+x)(350+65x+4x^2)}{(5+x)^7}.\end{aligned}$$

For the  $U/U/1$  queue, the true models are given by

$$\begin{aligned}y^{(2)} &= \frac{\delta_1}{4} - \frac{\theta_1}{2} + \frac{3\theta_2}{2} + \frac{1}{\delta_1} \left( \frac{\delta_2^2}{12} + \frac{\theta_1^2}{4} - \frac{\theta_1\theta_2}{2} + \frac{\theta_2^2}{4} \right) \\ y^{(3)} &= \frac{5\delta_1}{12} - \theta_1 + 2\theta_2 + \frac{1}{12\delta_1} (2\delta_2^2 + 9\theta_1^2 - 18\theta_1\theta_2 + 9\theta_2^2) \\ &\quad - \frac{1}{12\delta_1^2} (\theta_1 - \theta_2)(\delta_2^2 + 2\theta_1^2 - 4\theta_1\theta_2 + 2\theta_2^2) \\ y^{(4)} &= \frac{107\delta_1}{192} - \frac{25\theta_1}{16} + \frac{41\theta_2}{16} + \frac{1}{2880\delta_1} (750\delta_2^2 + 4590\theta_1^2 - 9180\theta_1\theta_2 + 4590\theta_2^2) \\ &\quad - \frac{1}{48\delta_1^2} (\theta_1 - \theta_2)(13\delta_2^2 + 35\theta_1^2 - 70\theta_1\theta_2 + 35\theta_2^2) \\ &\quad + \frac{1}{2880\delta_1^3} (13\delta_2^4 + 270\delta_2^2\theta_1^2 - 540\delta_2^2\theta_1\theta_2 + 270\delta_2^2\theta_2^2)\end{aligned}$$

$$\begin{aligned}
& + 405\theta_1^4 - 1620\theta_1^3\theta_2 + 2430\theta_1^2\theta_2^2 - 1620\theta_1\theta_2^3 + 405\theta_2^4) \\
y^{(5)} = & \frac{221\delta_1}{320} - \frac{107\theta_1}{48} + \frac{155\theta_2}{48} + \frac{1}{2880\delta_1}(1070\delta_2^2 + 8430\theta_1^2 - 16860\theta_1\theta_2 + 8430\theta_2^2) \\
& - \frac{1}{48\delta_1^2}(\theta_1 - \theta_2)(29\delta_2^2 + 99\theta_1^2 - 198\theta_1\theta_2 + 99\theta_2^2) \\
& + \frac{1}{2880\delta_1^3}(49\delta_2^4 + 1230\delta_2^2\theta_1^2 - 2460\delta_2^2\theta_1\theta_2 + 1230\delta_2^2\theta_2^2) \\
& + 2325\theta_1^4 - 9300\theta_1^3\theta_2 + 13950\theta_1^2\theta_2^2 - 9300\theta_1\theta_2^3 + 2325\theta_2^4) \\
& - \frac{1}{720\delta_1^4}(\theta_1 - \theta_2)(9\delta_2^4 + 80\delta_2^2\theta_1^2 - 160\delta_2^2\theta_1\theta_2 + 80\delta_2^2\theta_2^2 + 96\theta_1^4 \\
& - 384\theta_1^3\theta_2 + 576\theta_1^2\theta_2^2 - 384\theta_1\theta_2^3 + 96\theta_2^4)
\end{aligned}$$

## EC.4. Raw Simulation Output

Data Set 1

|     |           | $x_1$  | $x_2$  | $x_3$  | $x_4$  | $x_5$  | $x_6$  | $x_7$  | $x_8$  | $x_9$  | $x_{10}$ |
|-----|-----------|--------|--------|--------|--------|--------|--------|--------|--------|--------|----------|
| Run | Output    | 3.6    | 3.7    | 3.8    | 3.9    | 4.0    | 4.1    | 4.2    | 4.3    | 4.4    | 4.5      |
| 1   | $T_2$     | 6.532  | 1.092  | 1.492  | 11.613 | 0.440  | 8.782  | 9.688  | 5.339  | 4.418  | 7.956    |
|     | $T_3$     | 4.763  | 2.279  | 2.487  | 22.521 | 1.628  | 16.681 | 5.038  | 11.936 | 6.522  | 3.686    |
|     | $T_4$     | 4.687  | 1.305  | 6.765  | 26.267 | 2.783  | 10.602 | 13.819 | 8.835  | 3.694  | 13.921   |
|     | $T_5$     | 5.264  | 1.015  | 2.824  | 30.624 | 3.413  | 5.710  | 15.001 | 5.591  | 8.627  | 15.447   |
|     | $dT_2/dx$ | 1.814  | 0.295  | 1.370  | 3.052  | 0.652  | 2.142  | 2.306  | 1.241  | 1.345  | 1.768    |
|     | $dT_3/dx$ | 3.078  | 0.616  | 0.654  | 6.547  | 0.407  | 4.908  | 2.664  | 3.728  | 1.482  | 0.819    |
|     | $dT_4/dx$ | 3.132  | 0.917  | 1.780  | 7.645  | 0.695  | 5.341  | 4.891  | 2.054  | 0.839  | 3.093    |
|     | $dT_5/dx$ | 1.462  | 0.274  | 0.743  | 9.284  | 1.274  | 5.662  | 6.937  | 2.657  | 1.960  | 4.260    |
| 2   | $T_2$     | 7.608  | 1.440  | 7.261  | 3.873  | 1.899  | 3.469  | 9.984  | 1.431  | 12.533 | 1.701    |
|     | $T_3$     | 3.995  | 1.329  | 5.989  | 2.709  | 4.237  | 7.929  | 10.364 | 1.903  | 15.366 | 7.894    |
|     | $T_4$     | 5.239  | 2.726  | 6.737  | 7.645  | 12.301 | 17.273 | 5.696  | 3.508  | 17.969 | 7.872    |
|     | $T_5$     | 6.579  | 8.904  | 5.497  | 1.152  | 12.214 | 17.156 | 5.301  | 10.069 | 18.289 | 7.744    |
|     | $dT_2/dx$ | 2.372  | 0.389  | 3.180  | 0.993  | 0.474  | 1.018  | 2.383  | 0.332  | 3.063  | 0.378    |
|     | $dT_3/dx$ | 2.672  | 0.359  | 3.925  | 1.178  | 1.059  | 1.934  | 3.204  | 0.442  | 5.138  | 2.033    |
|     | $dT_4/dx$ | 3.678  | 0.737  | 4.794  | 1.960  | 3.075  | 5.097  | 3.715  | 0.819  | 6.291  | 2.862    |
|     | $dT_5/dx$ | 1.827  | 2.406  | 5.046  | 0.295  | 3.564  | 6.265  | 4.154  | 2.341  | 8.002  | 2.899    |
| 3   | $T_2$     | 7.802  | 1.613  | 1.702  | 4.706  | 5.489  | 1.770  | 2.316  | 1.640  | 5.873  | 25.133   |
|     | $T_3$     | 9.429  | 3.031  | 2.096  | 11.011 | 6.641  | 10.285 | 0.081  | 2.125  | 4.131  | 30.479   |
|     | $T_4$     | 7.334  | 0.803  | 5.660  | 12.446 | 10.994 | 11.840 | 4.598  | 10.431 | 6.275  | 50.209   |
|     | $T_5$     | 6.200  | 0.019  | 9.499  | 13.973 | 11.455 | 10.078 | 6.703  | 5.172  | 10.970 | 43.387   |
|     | $dT_2/dx$ | 2.758  | 0.489  | 0.447  | 1.905  | 1.448  | 0.431  | 0.809  | 0.381  | 1.334  | 5.585    |
|     | $dT_3/dx$ | 3.739  | 0.819  | 0.551  | 4.010  | 1.942  | 2.508  | 0.019  | 0.494  | 1.374  | 7.381    |
|     | $dT_4/dx$ | 3.844  | 0.217  | 1.903  | 4.439  | 3.384  | 4.621  | 1.094  | 2.797  | 2.234  | 11.819   |
|     | $dT_5/dx$ | 1.722  | 0.005  | 3.556  | 3.582  | 4.274  | 5.357  | 1.596  | 3.063  | 3.324  | 12.319   |
| 4   | $T_2$     | 0.125  | 1.411  | 4.335  | 3.491  | 6.873  | 7.390  | 5.743  | 4.038  | 1.589  | 0.406    |
|     | $T_3$     | 2.516  | 0.174  | 4.563  | 7.181  | 8.019  | 9.975  | 7.803  | 9.174  | 2.573  | 1.876    |
|     | $T_4$     | 2.286  | 13.853 | 1.195  | 10.043 | 9.003  | 13.860 | 5.366  | 15.783 | 1.691  | 1.795    |
|     | $T_5$     | 2.824  | 18.055 | 1.507  | 12.680 | 3.282  | 8.599  | 5.180  | 12.544 | 0.200  | 3.343    |
|     | $dT_2/dx$ | 0.034  | 0.381  | 1.140  | 0.895  | 2.377  | 1.802  | 1.367  | 1.058  | 0.361  | 0.090    |
|     | $dT_3/dx$ | 0.698  | 0.047  | 1.200  | 2.444  | 3.165  | 3.066  | 2.285  | 2.133  | 0.584  | 0.417    |
|     | $dT_4/dx$ | 0.635  | 3.744  | 1.261  | 2.575  | 4.148  | 4.822  | 3.281  | 4.022  | 0.384  | 0.399    |
|     | $dT_5/dx$ | 1.408  | 5.016  | 1.426  | 3.813  | 0.820  | 4.889  | 3.601  | 4.405  | 0.045  | 0.946    |
| 5   | $T_2$     | 3.936  | 9.800  | 3.093  | 23.809 | 3.366  | 8.562  | 8.976  | 9.939  | 17.323 | 3.326    |
|     | $T_3$     | 3.543  | 2.547  | 2.107  | 17.240 | 6.698  | 9.761  | 11.276 | 6.056  | 23.652 | 5.795    |
|     | $T_4$     | 10.669 | 1.988  | 10.270 | 23.081 | 7.790  | 2.950  | 10.300 | 6.554  | 21.505 | 4.160    |
|     | $T_5$     | 6.482  | 3.146  | 7.708  | 36.288 | 10.822 | 2.287  | 17.472 | 2.267  | 18.081 | 3.569    |
|     | $dT_2/dx$ | 1.093  | 2.648  | 1.139  | 6.104  | 1.113  | 2.569  | 3.098  | 2.435  | 3.937  | 1.182    |
|     | $dT_3/dx$ | 1.142  | 0.688  | 0.554  | 6.806  | 1.986  | 3.715  | 3.762  | 3.762  | 5.628  | 2.289    |
|     | $dT_4/dx$ | 3.353  | 1.073  | 3.173  | 8.460  | 2.259  | 0.719  | 4.233  | 4.725  | 5.636  | 0.924    |
|     | $dT_5/dx$ | 3.832  | 1.664  | 3.622  | 12.265 | 3.086  | 0.782  | 6.268  | 0.527  | 6.192  | 1.047    |
| 6   | $T_2$     | 13.319 | 1.065  | 9.269  | 13.481 | 12.798 | 0.012  | 15.706 | 0.920  | 3.756  | 6.120    |
|     | $T_3$     | 28.584 | 2.677  | 11.883 | 18.382 | 20.917 | 5.545  | 17.425 | 3.142  | 4.524  | 18.093   |
|     | $T_4$     | 28.491 | 2.071  | 24.240 | 21.678 | 16.693 | 4.303  | 18.921 | 2.669  | 0.246  | 25.719   |
|     | $T_5$     | 19.985 | 1.752  | 20.643 | 18.641 | 6.876  | 0.681  | 34.535 | 3.477  | 2.591  | 22.339   |
|     | $dT_2/dx$ | 3.699  | 0.287  | 3.175  | 3.566  | 3.199  | 0.003  | 3.747  | 0.214  | 0.853  | 1.405    |
|     | $dT_3/dx$ | 8.101  | 0.723  | 4.153  | 5.069  | 5.337  | 1.352  | 5.389  | 0.730  | 1.045  | 4.491    |
|     | $dT_4/dx$ | 8.460  | 0.917  | 7.455  | 6.949  | 5.890  | 1.466  | 6.065  | 0.620  | 0.055  | 6.352    |
|     | $dT_5/dx$ | 9.784  | 0.473  | 7.709  | 7.863  | 6.074  | 0.166  | 9.902  | 0.868  | 0.589  | 6.474    |

continued on next page

| continued from previous page |           |       |        |        |        |        |        |        |        |        |          |
|------------------------------|-----------|-------|--------|--------|--------|--------|--------|--------|--------|--------|----------|
|                              |           | $x_1$ | $x_2$  | $x_3$  | $x_4$  | $x_5$  | $x_6$  | $x_7$  | $x_8$  | $x_9$  | $x_{10}$ |
| Run                          | Output    | 3.6   | 3.7    | 3.8    | 3.9    | 4.0    | 4.1    | 4.2    | 4.3    | 4.4    | 4.5      |
| 7                            | $T_2$     | 3.035 | 9.008  | 5.290  | 13.933 | 2.362  | 0.435  | 2.850  | 13.454 | 1.793  | 1.246    |
|                              | $T_3$     | 7.335 | 1.760  | 23.620 | 20.391 | 2.863  | 7.863  | 2.401  | 11.741 | 0.692  | 11.946   |
|                              | $T_4$     | 4.561 | 0.805  | 22.006 | 24.583 | 0.815  | 6.628  | 0.933  | 9.752  | 0.924  | 10.891   |
|                              | $T_5$     | 6.735 | 0.118  | 22.318 | 12.336 | 2.517  | 11.064 | 1.835  | 11.257 | 11.697 | 11.729   |
|                              | $dT_2/dx$ | 0.843 | 2.561  | 1.392  | 4.047  | 0.590  | 0.106  | 0.678  | 4.419  | 0.407  | 0.277    |
|                              | $dT_3/dx$ | 2.867 | 2.607  | 6.397  | 6.267  | 0.865  | 1.917  | 0.571  | 4.756  | 0.157  | 2.654    |
|                              | $dT_4/dx$ | 3.690 | 0.217  | 7.207  | 8.641  | 0.203  | 2.646  | 0.222  | 5.155  | 0.210  | 2.814    |
|                              | $dT_5/dx$ | 4.451 | 0.031  | 7.601  | 8.757  | 0.629  | 2.698  | 0.437  | 5.657  | 2.853  | 3.069    |
| 8                            | $T_2$     | 7.582 | 12.953 | 2.126  | 3.127  | 0.766  | 2.809  | 4.806  | 3.495  | 14.836 | 1.206    |
|                              | $T_3$     | 0.726 | 0.979  | 0.836  | 3.614  | 3.303  | 0.738  | 4.483  | 1.985  | 15.128 | 0.453    |
|                              | $T_4$     | 1.468 | 3.932  | 0.887  | 8.160  | 5.279  | 1.944  | 8.373  | 6.136  | 25.327 | 4.167    |
|                              | $T_5$     | 2.798 | 1.834  | 3.465  | 5.771  | 1.635  | 4.504  | 8.862  | 12.133 | 24.908 | 4.403    |
|                              | $dT_2/dx$ | 2.223 | 3.500  | 0.559  | 0.802  | 0.191  | 0.685  | 1.426  | 0.812  | 3.389  | 0.268    |
|                              | $dT_3/dx$ | 2.288 | 0.264  | 0.220  | 0.926  | 0.999  | 0.180  | 1.513  | 0.461  | 4.097  | 0.100    |
|                              | $dT_4/dx$ | 0.408 | 1.062  | 0.258  | 2.092  | 1.319  | 0.474  | 2.800  | 1.460  | 6.607  | 0.926    |
|                              | $dT_5/dx$ | 0.777 | 0.495  | 0.911  | 2.722  | 0.408  | 1.256  | 2.110  | 2.895  | 8.711  | 1.128    |
| 9                            | $T_2$     | 7.739 | 0.584  | 11.405 | 2.574  | 3.534  | 4.415  | 0.393  | 14.925 | 5.133  | 3.374    |
|                              | $T_3$     | 6.594 | 0.678  | 0.570  | 2.786  | 6.642  | 5.930  | 6.233  | 5.058  | 1.054  | 6.209    |
|                              | $T_4$     | 1.912 | 6.790  | 3.886  | 0.143  | 11.310 | 4.598  | 8.197  | 0.591  | 9.717  | 13.830   |
|                              | $T_5$     | 2.572 | 8.763  | 0.058  | 0.158  | 11.003 | 2.924  | 12.638 | 4.036  | 11.999 | 7.224    |
|                              | $dT_2/dx$ | 2.324 | 0.157  | 3.815  | 0.660  | 0.935  | 1.660  | 0.093  | 3.958  | 1.618  | 0.810    |
|                              | $dT_3/dx$ | 2.609 | 0.183  | 0.150  | 0.714  | 2.036  | 2.807  | 1.484  | 1.176  | 1.743  | 1.823    |
|                              | $dT_4/dx$ | 0.531 | 1.835  | 1.022  | 0.036  | 2.827  | 2.920  | 2.599  | 0.137  | 2.208  | 4.363    |
|                              | $dT_5/dx$ | 0.714 | 2.967  | 0.015  | 0.040  | 3.621  | 0.713  | 3.848  | 0.938  | 3.246  | 1.605    |
| 10                           | $T_2$     | 1.777 | 2.543  | 8.342  | 12.069 | 6.095  | 3.224  | 4.560  | 3.038  | 1.565  | 6.383    |
|                              | $T_3$     | 5.056 | 4.279  | 0.047  | 14.939 | 17.054 | 3.124  | 0.719  | 11.227 | 1.707  | 7.470    |
|                              | $T_4$     | 6.177 | 1.753  | 4.492  | 18.968 | 20.820 | 6.116  | 0.801  | 8.332  | 7.549  | 8.350    |
|                              | $T_5$     | 5.778 | 14.492 | 2.674  | 19.473 | 15.372 | 3.280  | 0.274  | 19.648 | 27.667 | 9.712    |
|                              | $dT_2/dx$ | 0.559 | 0.687  | 2.301  | 3.094  | 3.366  | 0.786  | 3.138  | 0.706  | 0.355  | 1.418    |
|                              | $dT_3/dx$ | 1.404 | 1.156  | 0.012  | 3.944  | 7.103  | 1.484  | 0.171  | 2.611  | 0.608  | 1.660    |
|                              | $dT_4/dx$ | 1.808 | 0.473  | 1.182  | 5.427  | 8.212  | 2.410  | 0.190  | 2.859  | 2.254  | 1.967    |
|                              | $dT_5/dx$ | 1.928 | 3.916  | 0.703  | 6.152  | 8.845  | 2.531  | 0.065  | 6.026  | 7.227  | 3.772    |

Data Set 2

|     |           | $x_1$  | $x_2$  | $x_3$  | $x_4$  | $x_5$  | $x_6$  | $x_7$ | $x_8$ | $x_9$  | $x_{10}$ |
|-----|-----------|--------|--------|--------|--------|--------|--------|-------|-------|--------|----------|
| Run | Output    | 3.6    | 3.7    | 3.8    | 3.9    | 4.0    | 4.1    | 4.2   | 4.3   | 4.4    | 4.5      |
| 1   | $T_2$     | 8.190  | 0.116  | 6.911  | 3.007  | 7.284  | 1.120  | 3.397 | 0.992 | 6.040  | 5.704    |
|     | $T_3$     | 2.569  | 6.958  | 7.710  | 4.886  | 28.551 | 0.306  | 3.295 | 3.733 | 6.028  | 7.130    |
|     | $T_4$     | 4.341  | 10.905 | 23.154 | 9.136  | 36.469 | 0.328  | 4.130 | 3.031 | 8.830  | 11.229   |
|     | $T_5$     | 14.747 | 11.557 | 19.359 | 10.070 | 38.236 | 5.095  | 3.570 | 3.322 | 6.056  | 6.081    |
|     | $dT_2/dx$ | 2.602  | 0.031  | 1.843  | 0.983  | 1.990  | 0.273  | 0.808 | 0.230 | 1.572  | 1.675    |
|     | $dT_3/dx$ | 0.714  | 1.881  | 2.321  | 1.787  | 7.361  | 0.074  | 0.784 | 0.868 | 1.652  | 2.268    |
|     | $dT_4/dx$ | 1.684  | 3.294  | 6.721  | 2.342  | 9.406  | 0.080  | 1.213 | 0.935 | 2.613  | 3.271    |
|     | $dT_5/dx$ | 5.384  | 4.224  | 8.480  | 2.663  | 10.081 | 1.242  | 1.230 | 0.772 | 3.214  | 3.537    |
| 2   | $T_2$     | 2.379  | 8.656  | 3.826  | 2.121  | 6.974  | 2.602  | 1.816 | 4.200 | 0.052  | 23.445   |
|     | $T_3$     | 3.258  | 17.171 | 14.486 | 3.828  | 9.808  | 5.518  | 0.284 | 4.455 | 1.992  | 21.362   |
|     | $T_4$     | 10.032 | 14.982 | 9.165  | 8.560  | 15.341 | 9.140  | 7.160 | 0.734 | 3.621  | 7.824    |
|     | $T_5$     | 8.865  | 4.340  | 11.719 | 12.588 | 6.816  | 10.828 | 4.641 | 1.364 | 11.227 | 6.484    |
|     | $dT_2/dx$ | 0.660  | 2.437  | 1.356  | 0.543  | 2.520  | 0.634  | 0.432 | 0.976 | 0.011  | 5.925    |
|     | $dT_3/dx$ | 1.294  | 4.964  | 5.134  | 1.097  | 4.177  | 1.346  | 0.067 | 1.098 | 0.452  | 6.317    |
|     | $dT_4/dx$ | 2.786  | 5.238  | 5.623  | 3.125  | 7.120  | 2.647  | 1.704 | 1.269 | 0.823  | 6.343    |
|     | $dT_5/dx$ | 3.337  | 5.586  | 7.995  | 5.141  | 7.144  | 3.137  | 2.745 | 0.317 | 2.780  | 6.420    |

continued on next page

| continued from previous page |           |        |        |        |        |       |        |        |        |        |          |
|------------------------------|-----------|--------|--------|--------|--------|-------|--------|--------|--------|--------|----------|
|                              |           | $x_1$  | $x_2$  | $x_3$  | $x_4$  | $x_5$ | $x_6$  | $x_7$  | $x_8$  | $x_9$  | $x_{10}$ |
| Run                          | Output    | 3.6    | 3.7    | 3.8    | 3.9    | 4.0   | 4.1    | 4.2    | 4.3    | 4.4    | 4.5      |
| 3                            | $T_2$     | 12.310 | 6.305  | 9.926  | 7.122  | 6.269 | 14.391 | 5.086  | 7.641  | 10.910 | 5.447    |
|                              | $T_3$     | 18.996 | 6.785  | 18.615 | 7.401  | 3.858 | 11.364 | 0.590  | 2.073  | 13.296 | 9.771    |
|                              | $T_4$     | 26.102 | 2.414  | 23.592 | 11.288 | 8.998 | 9.585  | 4.372  | 2.393  | 13.475 | 0.232    |
|                              | $T_5$     | 19.221 | 3.287  | 26.823 | 13.496 | 7.350 | 11.470 | 1.459  | 3.374  | 18.527 | 0.724    |
|                              | $dT_2/dx$ | 3.419  | 2.201  | 2.612  | 1.826  | 2.009 | 3.973  | 1.210  | 2.006  | 2.995  | 4.539    |
|                              | $dT_3/dx$ | 6.208  | 1.833  | 5.696  | 1.897  | 0.964 | 4.626  | 0.140  | 2.267  | 4.299  | 5.585    |
|                              | $dT_4/dx$ | 8.302  | 0.652  | 7.185  | 3.232  | 2.249 | 5.234  | 1.152  | 2.644  | 4.429  | 0.051    |
|                              | $dT_5/dx$ | 10.176 | 0.888  | 8.863  | 4.555  | 2.297 | 6.724  | 0.347  | 0.784  | 5.693  | 0.161    |
| 4                            | $T_2$     | 2.346  | 8.677  | 1.878  | 1.166  | 6.889 | 2.162  | 0.229  | 8.789  | 2.043  | 2.480    |
|                              | $T_3$     | 1.886  | 10.868 | 11.501 | 1.255  | 2.236 | 1.014  | 0.919  | 2.877  | 0.427  | 16.610   |
|                              | $T_4$     | 6.077  | 12.848 | 10.048 | 3.623  | 7.376 | 0.830  | 2.546  | 2.733  | 5.052  | 14.196   |
|                              | $T_5$     | 4.640  | 14.350 | 13.881 | 6.277  | 6.384 | 0.725  | 11.834 | 8.626  | 3.779  | 10.624   |
|                              | $dT_2/dx$ | 1.943  | 2.661  | 0.494  | 0.299  | 1.827 | 0.527  | 0.054  | 2.044  | 0.586  | 3.728    |
|                              | $dT_3/dx$ | 0.523  | 4.090  | 3.172  | 0.321  | 0.559 | 0.247  | 0.218  | 2.466  | 0.097  | 7.333    |
|                              | $dT_4/dx$ | 1.688  | 5.359  | 3.349  | 0.929  | 1.844 | 0.202  | 0.606  | 0.635  | 1.148  | 7.412    |
|                              | $dT_5/dx$ | 2.002  | 7.505  | 4.621  | 1.846  | 1.917 | 0.176  | 2.817  | 2.326  | 0.858  | 7.664    |
| 5                            | $T_2$     | 10.405 | 2.731  | 7.292  | 7.293  | 3.397 | 8.688  | 2.174  | 5.617  | 9.628  | 13.767   |
|                              | $T_3$     | 7.545  | 4.220  | 13.171 | 4.698  | 1.085 | 19.540 | 1.277  | 5.435  | 2.686  | 11.653   |
|                              | $T_4$     | 11.683 | 11.793 | 13.102 | 4.087  | 6.226 | 28.663 | 1.338  | 8.498  | 1.229  | 11.391   |
|                              | $T_5$     | 5.773  | 7.515  | 4.852  | 2.455  | 4.454 | 31.173 | 3.714  | 6.671  | 2.513  | 5.004    |
|                              | $dT_2/dx$ | 3.782  | 0.738  | 1.919  | 3.435  | 0.849 | 2.119  | 0.517  | 1.711  | 2.326  | 3.153    |
|                              | $dT_3/dx$ | 2.096  | 1.140  | 4.310  | 1.204  | 0.271 | 5.311  | 0.304  | 2.326  | 0.610  | 3.505    |
|                              | $dT_4/dx$ | 3.496  | 3.187  | 5.105  | 1.846  | 1.556 | 7.733  | 0.318  | 3.313  | 0.279  | 3.612    |
|                              | $dT_5/dx$ | 4.677  | 3.382  | 6.090  | 0.629  | 1.655 | 8.531  | 0.884  | 3.404  | 0.571  | 3.965    |
| 6                            | $T_2$     | 2.853  | 1.906  | 4.025  | 0.399  | 5.026 | 1.765  | 5.911  | 0.537  | 1.068  | 10.459   |
|                              | $T_3$     | 3.128  | 3.395  | 8.237  | 0.521  | 1.070 | 4.918  | 6.497  | 3.671  | 7.572  | 4.370    |
|                              | $T_4$     | 4.238  | 1.940  | 10.432 | 1.631  | 5.830 | 7.237  | 4.589  | 6.589  | 13.366 | 0.757    |
|                              | $T_5$     | 2.634  | 2.361  | 8.417  | 1.585  | 5.014 | 11.334 | 5.702  | 7.553  | 5.849  | 2.092    |
|                              | $dT_2/dx$ | 1.374  | 0.515  | 1.300  | 0.102  | 1.256 | 0.430  | 1.407  | 0.124  | 0.526  | 2.707    |
|                              | $dT_3/dx$ | 1.799  | 0.917  | 2.167  | 0.133  | 1.304 | 1.199  | 1.804  | 0.853  | 1.721  | 0.971    |
|                              | $dT_4/dx$ | 1.177  | 1.138  | 2.745  | 0.418  | 2.638 | 2.218  | 1.900  | 1.532  | 3.354  | 1.105    |
|                              | $dT_5/dx$ | 1.300  | 0.638  | 3.507  | 0.406  | 2.763 | 2.764  | 2.166  | 1.977  | 3.702  | 0.464    |
| 7                            | $T_2$     | 9.513  | 2.017  | 5.752  | 2.837  | 7.821 | 7.026  | 0.471  | 7.703  | 1.097  | 11.008   |
|                              | $T_3$     | 12.459 | 2.720  | 10.734 | 3.116  | 7.766 | 3.172  | 2.099  | 10.088 | 0.902  | 20.644   |
|                              | $T_4$     | 14.616 | 2.132  | 11.499 | 0.920  | 8.622 | 3.820  | 10.078 | 21.770 | 2.002  | 13.215   |
|                              | $T_5$     | 9.273  | 5.375  | 9.442  | 0.874  | 0.608 | 2.402  | 18.413 | 19.897 | 0.729  | 10.482   |
|                              | $dT_2/dx$ | 2.971  | 1.275  | 1.513  | 0.727  | 1.955 | 1.713  | 0.112  | 1.975  | 1.946  | 4.249    |
|                              | $dT_3/dx$ | 4.662  | 0.735  | 3.499  | 0.799  | 1.941 | 2.290  | 0.499  | 3.143  | 0.205  | 7.161    |
|                              | $dT_4/dx$ | 5.657  | 0.576  | 3.889  | 0.236  | 3.092 | 2.747  | 2.399  | 5.970  | 0.455  | 7.325    |
|                              | $dT_5/dx$ | 6.432  | 1.452  | 4.468  | 0.224  | 0.152 | 3.139  | 4.524  | 6.967  | 0.165  | 7.916    |
| 8                            | $T_2$     | 3.127  | 5.131  | 1.584  | 13.773 | 1.278 | 1.402  | 2.886  | 5.073  | 0.381  | 4.472    |
|                              | $T_3$     | 1.206  | 6.881  | 6.959  | 23.595 | 5.051 | 0.804  | 2.579  | 12.005 | 3.509  | 1.415    |
|                              | $T_4$     | 3.027  | 9.205  | 4.704  | 22.190 | 8.459 | 0.757  | 6.168  | 12.417 | 11.938 | 0.872    |
|                              | $T_5$     | 13.277 | 7.234  | 5.844  | 15.554 | 8.569 | 5.100  | 8.749  | 20.168 | 4.010  | 3.307    |
|                              | $dT_2/dx$ | 0.983  | 2.288  | 1.305  | 3.611  | 0.421 | 0.342  | 0.787  | 2.535  | 0.086  | 0.993    |
|                              | $dT_3/dx$ | 0.335  | 2.869  | 1.831  | 7.315  | 1.517 | 0.196  | 0.614  | 4.164  | 0.797  | 0.314    |
|                              | $dT_4/dx$ | 0.840  | 4.002  | 1.238  | 7.397  | 2.514 | 0.295  | 1.914  | 4.267  | 3.409  | 0.193    |
|                              | $dT_5/dx$ | 4.126  | 4.064  | 1.663  | 7.467  | 2.694 | 1.244  | 2.663  | 6.602  | 3.421  | 0.735    |
| 9                            | $T_2$     | 7.319  | 0.167  | 4.658  | 1.715  | 0.625 | 5.846  | 6.939  | 19.009 | 6.107  | 9.265    |
|                              | $T_3$     | 5.050  | 1.656  | 6.451  | 1.994  | 2.580 | 10.248 | 9.344  | 19.833 | 10.785 | 12.439   |
|                              | $T_4$     | 5.588  | 9.350  | 0.388  | 11.459 | 4.474 | 11.550 | 6.113  | 18.371 | 12.631 | 13.216   |
|                              | $T_5$     | 1.754  | 3.652  | 1.109  | 16.238 | 0.833 | 4.293  | 0.802  | 12.879 | 18.544 | 15.676   |
|                              |           |        |        |        |        |       |        |        |        |        |          |

| continued from previous page |           |       |        |       |       |       |       |       |       |       |          |
|------------------------------|-----------|-------|--------|-------|-------|-------|-------|-------|-------|-------|----------|
|                              |           | $x_1$ | $x_2$  | $x_3$ | $x_4$ | $x_5$ | $x_6$ | $x_7$ | $x_8$ | $x_9$ | $x_{10}$ |
| Run                          | Output    | 3.6   | 3.7    | 3.8   | 3.9   | 4.0   | 4.1   | 4.2   | 4.3   | 4.4   | 4.5      |
|                              | $dT_2/dx$ | 2.033 | 0.045  | 1.226 | 0.439 | 0.156 | 1.426 | 1.652 | 4.420 | 1.684 | 2.784    |
|                              | $dT_3/dx$ | 1.402 | 0.447  | 1.697 | 0.511 | 0.645 | 2.499 | 2.395 | 6.930 | 2.451 | 3.686    |
|                              | $dT_4/dx$ | 2.110 | 2.941  | 0.102 | 2.938 | 1.508 | 4.228 | 3.184 | 7.224 | 3.119 | 3.911    |
|                              | $dT_5/dx$ | 0.487 | 3.380  | 0.291 | 5.663 | 0.208 | 4.332 | 0.191 | 7.417 | 5.163 | 4.815    |
| 10                           | $T_2$     | 1.565 | 9.568  | 0.707 | 5.825 | 1.357 | 1.070 | 0.729 | 4.065 | 0.496 | 6.337    |
|                              | $T_3$     | 1.363 | 9.299  | 6.004 | 8.644 | 1.340 | 4.394 | 3.744 | 0.146 | 1.433 | 13.040   |
|                              | $T_4$     | 2.122 | 8.986  | 5.487 | 6.589 | 2.982 | 3.578 | 1.899 | 2.277 | 0.218 | 1.156    |
|                              | $T_5$     | 6.935 | 12.252 | 0.661 | 6.301 | 0.950 | 2.733 | 7.220 | 2.547 | 5.747 | 4.979    |
|                              | $dT_2/dx$ | 0.434 | 2.586  | 0.186 | 1.493 | 0.339 | 0.260 | 0.173 | 0.945 | 0.112 | 2.370    |
|                              | $dT_3/dx$ | 0.687 | 2.915  | 1.580 | 3.239 | 0.335 | 1.071 | 0.891 | 0.034 | 0.325 | 4.876    |
|                              | $dT_4/dx$ | 0.589 | 3.086  | 2.242 | 1.689 | 0.745 | 1.871 | 0.452 | 0.529 | 0.049 | 0.256    |
|                              | $dT_5/dx$ | 2.245 | 4.134  | 0.174 | 1.615 | 0.237 | 0.666 | 1.719 | 0.592 | 1.306 | 1.106    |

## EC.5. Additional Tables and Graphs

**Table EC.1** Parameter estimates and performance metrics for M/M/1 queue data set 2

| $i$ | $y^{(i)}$ model                       | $\hat{\beta}_1$ | $\hat{\beta}_0$ | $L_2$ | $\widehat{\text{Var}}(\hat{\beta}_1)$ | $s^2(\hat{\beta}_1)$ |
|-----|---------------------------------------|-----------------|-----------------|-------|---------------------------------------|----------------------|
| 2   | standard                              | 0.62            | 3.32            | 0.073 | 3.22                                  | 5.68                 |
|     | DiGAR                                 | 1.55            | -0.47           | 0.004 | 0.038                                 | 0.047                |
|     | DiGAR ( $\alpha = 0.25$ )             | 1.43            | 0.04            | 0.007 | 0.019                                 | 0.029                |
|     | DiGAR ( $\alpha = 0.75$ )             | 1.60            | -0.67           | 0.003 | 0.216                                 | 0.217                |
|     | DiGAR ( $\alpha \propto 1/\sigma^2$ ) | 1.62            | -0.71           | 0.001 | 0.018                                 | 0.030                |
|     | DiGARn                                | 1.62            | -0.74           | 0.003 | 0.033                                 | 0.029                |
|     | DiGAR*                                | 1.25            | -0.15           | 0.82  | 0.633                                 | 0.036                |
|     | DiGAR**                               | 1.63            | -0.77           | 0.001 | 0.018                                 | 0.030                |
|     | “true” linear                         | 1.69            | -1.00           | 4E-6  |                                       |                      |
| 3   | standard                              | 2.83            | -4.24           | 0.026 | 8.22                                  | 7.17                 |
|     | DiGAR                                 | 2.32            | -2.16           | 0.009 | 0.095                                 | 0.066                |
|     | DiGAR ( $\alpha = 0.25$ )             | 2.39            | -2.44           | 0.009 | 0.063                                 | 0.032                |
|     | DiGAR ( $\alpha = 0.75$ )             | 2.29            | -2.05           | 0.009 | 0.361                                 | 0.300                |
|     | DiGAR ( $\alpha \propto 1/\sigma^2$ ) | 2.28            | -2.04           | 0.002 | 0.059                                 | 0.029                |
|     | DiGARn                                | 2.28            | -2.00           | 0.009 | 0.094                                 | 0.029                |
|     | DiGAR*                                | 1.33            | -1.44           | 9.18  | 0.346                                 | 0.098                |
|     | DiGAR**                               | 2.28            | -2.02           | 0.006 | 0.060                                 | 0.028                |
|     | “true” linear                         | 2.30            | -2.18           | 2E-5  |                                       |                      |
| 4   | standard                              | 4.31            | -8.35           | 1.02  | 13.5                                  | 5.35                 |
|     | DiGAR                                 | 3.08            | -3.35           | 0.90  | 0.15                                  | 0.074                |
|     | DiGAR ( $\alpha = 0.25$ )             | 3.24            | -2.97           | 0.90  | 0.090                                 | 0.041                |
|     | DiGAR ( $\alpha = 0.75$ )             | 3.01            | -4.01           | 0.90  | 0.60                                  | 0.265                |
|     | DiGAR ( $\alpha \propto 1/\sigma^2$ ) | 2.99            | -3.06           | 0.78  | 0.084                                 | 0.035                |
|     | DiGARn                                | 2.98            | -2.97           | 0.90  | 0.15                                  | 0.038                |
|     | DiGAR*                                | 1.88            | -1.15           | 2.50  | 1.63                                  | 0.110                |
|     | DiGAR**                               | 2.98            | -2.97           | 0.89  | 0.085                                 | 0.035                |
|     | “true” linear                         | 2.85            | -3.43           | 7E-5  |                                       |                      |
| 5   | standard                              | 6.18            | -15.5           | 0.80  | 10.1                                  | 9.19                 |
|     | DiGAR                                 | 3.63            | -5.18           | 0.32  | 0.178                                 | 0.114                |
|     | DiGAR ( $\alpha = 0.25$ )             | 3.97            | -6.54           | 0.34  | 0.104                                 | 0.068                |
|     | DiGAR ( $\alpha = 0.75$ )             | 3.50            | -4.46           | 0.32  | 0.585                                 | 0.42                 |
|     | DiGAR ( $\alpha \propto 1/\sigma^2$ ) | 3.45            | -4.58           | 0.18  | 0.099                                 | 0.064                |
|     | DiGARn                                | 3.44            | -4.41           | 0.32  | 0.141                                 | 0.072                |
|     | DiGAR*                                | 2.08            | -1.74           | 4.73  | 2.070                                 | 0.096                |
|     | DiGAR**                               | 3.43            | -4.40           | 0.26  | 0.100                                 | 0.064                |
|     | “true” linear                         | 3.37            | -4.70           | 2E-4  |                                       |                      |

**Table EC.2** Parameter estimates and performance metrics for linear fit (data set 1)

| Run  |           | standard model  |                 |                                       |        | DiGAR model     |                 |                                       |        | $\widehat{\text{Var}}$ |
|------|-----------|-----------------|-----------------|---------------------------------------|--------|-----------------|-----------------|---------------------------------------|--------|------------------------|
|      |           | $\hat{\beta}_1$ | $\hat{\beta}_0$ | $\widehat{\text{Var}}(\hat{\beta}_1)$ | $L_2$  | $\hat{\beta}_1$ | $\hat{\beta}_0$ | $\widehat{\text{Var}}(\hat{\beta}_1)$ | $L_2$  | Ratio                  |
| 1    | $y^{(2)}$ | -0.94           | 8.08            | 11.540                                | 2.692  | 1.04            | 0.07            | 0.150                                 | 2.297  | 76                     |
|      | $y^{(3)}$ | -1.11           | 11.62           | 84.557                                | 0.707  | 1.74            | 0.09            | 0.862                                 | 0.019  | 98                     |
|      | $y^{(4)}$ | -5.98           | 35.30           | 158.298                               | 12.617 | 2.46            | 1.11            | 2.009                                 | 7.887  | 78                     |
|      | $y^{(5)}$ | -15.11          | 73.01           | 125.698                               | 28.162 | 2.62            | 1.20            | 3.529                                 | 7.454  | 35                     |
| 2    | $y^{(2)}$ | 7.63            | -25.31          | 55.041                                | 2.202  | 2.01            | -2.55           | 0.761                                 | 0.066  | 72                     |
|      | $y^{(3)}$ | -0.51           | 10.28           | 69.931                                | 1.547  | 2.36            | -1.34           | 0.862                                 | 1.069  | 81                     |
|      | $y^{(4)}$ | -9.21           | 45.95           | 16.390                                | 9.098  | 2.69            | -2.23           | 1.405                                 | 0.264  | 11                     |
|      | $y^{(5)}$ | -2.72           | 18.89           | 18.219                                | 3.243  | 3.91            | -7.96           | 0.830                                 | 1.012  | 21                     |
| 3    | $y^{(2)}$ | -2.36           | 18.10           | 13.009                                | 7.446  | 2.30            | -0.76           | 0.301                                 | 6.469  | 43                     |
|      | $y^{(3)}$ | -8.07           | 41.94           | 47.758                                | 10.679 | 2.48            | -0.78           | 1.369                                 | 4.155  | 34                     |
|      | $y^{(4)}$ | -17.06          | 79.36           | 69.784                                | 28.173 | 1.95            | 2.37            | 3.350                                 | 4.127  | 20                     |
|      | $y^{(5)}$ | -12.67          | 61.88           | 87.034                                | 18.029 | 2.78            | -0.67           | 3.117                                 | 2.428  | 27                     |
| 4    | $y^{(2)}$ | -1.10           | 8.14            | 13.643                                | 4.826  | 1.22            | -1.29           | 0.227                                 | 4.363  | 60                     |
|      | $y^{(3)}$ | 0.85            | 1.50            | 45.485                                | 4.355  | 1.82            | -2.42           | 0.708                                 | 4.242  | 64                     |
|      | $y^{(4)}$ | -1.69           | 13.37           | 27.735                                | 3.509  | 2.01            | -1.62           | 0.681                                 | 2.300  | 40                     |
|      | $y^{(5)}$ | -2.15           | 16.80           | 27.360                                | 2.461  | 2.77            | -3.10           | 0.837                                 | 0.636  | 32                     |
| 5    | $y^{(2)}$ | 3.64            | -7.65           | 17.072                                | 1.604  | 2.18            | -1.71           | 0.214                                 | 1.387  | 79                     |
|      | $y^{(3)}$ | -0.26           | 8.18            | 48.315                                | 0.397  | 1.93            | -0.68           | 0.549                                 | 0.008  | 88                     |
|      | $y^{(4)}$ | -5.18           | 30.76           | 82.857                                | 6.468  | 2.42            | 0.01            | 1.247                                 | 2.565  | 66                     |
|      | $y^{(5)}$ | -0.14           | 7.99            | 98.658                                | 2.843  | 3.11            | -5.19           | 1.159                                 | 2.099  | 85                     |
| 6    | $y^{(2)}$ | 3.54            | -10.95          | 11.617                                | 5.695  | 1.17            | -1.34           | 0.153                                 | 5.505  | 75                     |
|      | $y^{(3)}$ | 2.39            | -5.32           | 8.185                                 | 7.000  | 1.37            | -1.21           | 0.082                                 | 7.052  | 99                     |
|      | $y^{(4)}$ | 2.41            | -4.09           | 20.915                                | 5.439  | 1.87            | -1.90           | 0.187                                 | 5.486  | 111                    |
|      | $y^{(5)}$ | 2.05            | -3.06           | 13.345                                | 12.320 | 1.98            | -2.75           | 0.194                                 | 12.333 | 68                     |
| 7    | $y^{(2)}$ | 0.54            | 3.35            | 18.596                                | 0.185  | 1.74            | -1.54           | 0.218                                 | 0.104  | 85                     |
|      | $y^{(3)}$ | 3.03            | -4.92           | 51.567                                | 0.086  | 2.53            | -2.90           | 0.672                                 | 0.057  | 76                     |
|      | $y^{(4)}$ | 3.67            | -5.99           | 60.135                                | 0.548  | 3.27            | -4.37           | 0.822                                 | 0.518  | 73                     |
|      | $y^{(5)}$ | 5.15            | -13.12          | 65.729                                | 1.465  | 3.67            | -7.10           | 1.074                                 | 1.277  | 61                     |
| 8    | $y^{(2)}$ | -2.20           | 12.80           | 19.575                                | 4.354  | 1.07            | -0.41           | 0.281                                 | 3.459  | 69                     |
|      | $y^{(3)}$ | -3.87           | 22.06           | 64.124                                | 2.784  | 1.55            | 0.13            | 0.958                                 | 0.509  | 66                     |
|      | $y^{(4)}$ | -1.06           | 12.26           | 57.473                                | 0.947  | 2.33            | -1.45           | 0.792                                 | 0.035  | 72                     |
|      | $y^{(5)}$ | -3.91           | 25.02           | 39.222                                | 3.273  | 2.91            | -2.59           | 0.903                                 | 0.066  | 43                     |
| 9    | $y^{(2)}$ | 9.20            | -31.08          | 29.635                                | 3.501  | 2.17            | -2.61           | 0.628                                 | 0.095  | 47                     |
|      | $y^{(3)}$ | 13.76           | -47.69          | 20.445                                | 8.728  | 3.14            | -4.69           | 1.145                                 | 0.791  | 17                     |
|      | $y^{(4)}$ | 10.46           | -33.05          | 23.459                                | 4.807  | 3.69            | -5.61           | 0.705                                 | 1.333  | 33                     |
|      | $y^{(5)}$ | 14.88           | -52.69          | 45.395                                | 9.718  | 4.09            | -8.97           | 1.584                                 | 1.696  | 28                     |
| 10   | $y^{(2)}$ | -1.17           | 7.92            | 13.201                                | 7.023  | 0.73            | 0.20            | 0.168                                 | 6.580  | 78                     |
|      | $y^{(3)}$ | 0.55            | 2.71            | 24.543                                | 4.486  | 1.52            | -1.20           | 0.340                                 | 4.338  | 72                     |
|      | $y^{(4)}$ | -6.04           | 27.98           | 5.457                                 | 23.736 | 0.60            | 1.09            | 0.398                                 | 19.245 | 13                     |
|      | $y^{(5)}$ | -2.98           | 17.10           | 15.539                                | 16.176 | 1.05            | 0.79            | 0.303                                 | 14.055 | 51                     |
| Mean | $y^{(2)}$ | 1.68            | -1.66           | 20.293                                | 3.953  | 1.56            | -1.19           | 0.310                                 | 3.033  | 69                     |
|      | $y^{(3)}$ | 0.68            | 4.036           | 46.491                                | 4.077  | 2.04            | -1.50           | 0.755                                 | 2.224  | 70                     |
|      | $y^{(4)}$ | -2.97           | 20.19           | 52.250                                | 9.534  | 2.33            | -1.26           | 1.160                                 | 4.376  | 51                     |
|      | $y^{(5)}$ | -1.76           | 15.18           | 53.620                                | 9.769  | 2.89            | -3.63           | 1.353                                 | 4.306  | 45                     |

**Table EC.3** Parameter estimates and performance metrics for linear fit (data set 2)

| Run  |           | standard model  |                 |                                       |        | DiGAR model     |                 |                                       |        | $\widehat{\text{Var}}$ |
|------|-----------|-----------------|-----------------|---------------------------------------|--------|-----------------|-----------------|---------------------------------------|--------|------------------------|
|      |           | $\hat{\beta}_1$ | $\hat{\beta}_0$ | $\widehat{\text{Var}}(\hat{\beta}_1)$ | $L_2$  | $\hat{\beta}_1$ | $\hat{\beta}_0$ | $\widehat{\text{Var}}(\hat{\beta}_1)$ | $L_2$  | Ratio                  |
| 1    | $y^{(2)}$ | 3.51            | -8.48           | 18.843                                | 0.215  | 1.74            | -1.33           | 0.179                                 | 0.015  | 105                    |
|      | $y^{(3)}$ | 1.81            | 0.43            | 66.998                                | 0.369  | 2.44            | -2.12           | 0.727                                 | 0.355  | 92                     |
|      | $y^{(4)}$ | 4.89            | -10.53          | 72.328                                | 1.415  | 3.18            | -3.61           | 0.843                                 | 1.200  | 86                     |
|      | $y^{(5)}$ | 6.92            | -18.68          | 102.134                               | 0.921  | 3.72            | -5.70           | 1.349                                 | 0.162  | 76                     |
| 2    | $y^{(2)}$ | 0.92            | 1.38            | 21.543                                | 0.535  | 1.42            | -0.62           | 0.231                                 | 0.503  | 93                     |
|      | $y^{(3)}$ | 8.46            | -28.09          | 16.866                                | 3.127  | 2.67            | -4.65           | 0.503                                 | 0.830  | 34                     |
|      | $y^{(4)}$ | 6.87            | -19.13          | 33.746                                | 1.285  | 3.58            | -5.78           | 0.519                                 | 0.335  | 65                     |
|      | $y^{(5)}$ | 7.06            | -19.29          | 32.933                                | 0.938  | 3.94            | -6.66           | 0.651                                 | 0.132  | 51                     |
| 3    | $y^{(2)}$ | 10.58           | -37.05          | 55.559                                | 4.802  | 2.25            | -3.29           | 0.977                                 | 0.022  | 57                     |
|      | $y^{(3)}$ | 10.19           | -33.34          | 92.343                                | 4.366  | 2.89            | -3.76           | 1.274                                 | 0.603  | 72                     |
|      | $y^{(4)}$ | 25.78           | -92.34          | 180.341                               | 45.919 | 5.32            | -9.50           | 4.571                                 | 14.359 | 39                     |
|      | $y^{(5)}$ | 22.21           | -78.22          | 127.947                               | 28.671 | 5.28            | -9.63           | 3.468                                 | 7.316  | 37                     |
| 4    | $y^{(2)}$ | 0.58            | 1.19            | 9.273                                 | 4.937  | 0.92            | -0.20           | 0.099                                 | 4.898  | 94                     |
|      | $y^{(3)}$ | 2.30            | -3.92           | 15.660                                | 2.730  | 1.66            | -1.33           | 0.195                                 | 2.755  | 80                     |
|      | $y^{(4)}$ | -1.56           | 13.82           | 44.532                                | 1.540  | 2.22            | -1.49           | 0.578                                 | 0.381  | 77                     |
|      | $y^{(5)}$ | -4.99           | 27.02           | 44.132                                | 8.274  | 2.06            | -1.51           | 0.854                                 | 4.137  | 52                     |
| 5    | $y^{(2)}$ | 2.55            | -1.12           | 61.960                                | 10.137 | 2.53            | -1.05           | 0.556                                 | 10.135 | 111                    |
|      | $y^{(3)}$ | 10.48           | -33.58          | 51.622                                | 6.794  | 3.60            | -5.72           | 0.945                                 | 2.830  | 55                     |
|      | $y^{(4)}$ | 0.99            | 5.93            | 70.907                                | 3.160  | 3.27            | -3.31           | 0.899                                 | 2.959  | 79                     |
|      | $y^{(5)}$ | -0.84           | 14.21           | 156.203                               | 4.238  | 3.57            | -3.63           | 2.022                                 | 3.164  | 77                     |
| 6    | $y^{(2)}$ | -5.69           | 30.67           | 45.150                                | 6.161  | 1.43            | 1.86            | 0.789                                 | 2.857  | 57                     |
|      | $y^{(3)}$ | -8.69           | 48.33           | 98.478                                | 39.637 | 2.70            | 2.18            | 1.914                                 | 32.306 | 51                     |
|      | $y^{(4)}$ | -10.08          | 55.31           | 153.068                               | 46.860 | 3.32            | 1.06            | 2.872                                 | 36.722 | 53                     |
|      | $y^{(5)}$ | -1.05           | 17.39           | 182.372                               | 17.166 | 4.53            | -5.20           | 2.510                                 | 16.064 | 73                     |
| 7    | $y^{(2)}$ | -3.69           | 20.31           | 32.675                                | 2.011  | 1.13            | 0.75            | 0.536                                 | 0.266  | 61                     |
|      | $y^{(3)}$ | -4.51           | 27.31           | 83.276                                | 6.180  | 2.34            | -0.42           | 1.176                                 | 3.368  | 71                     |
|      | $y^{(4)}$ | -4.16           | 25.03           | 103.797                               | 2.990  | 2.55            | -2.13           | 1.629                                 | 0.010  | 64                     |
|      | $y^{(5)}$ | 2.89            | -2.56           | 57.997                                | 0.058  | 3.56            | -5.27           | 1.029                                 | 0.047  | 56                     |
| 8    | $y^{(2)}$ | -1.84           | 12.80           | 32.380                                | 0.976  | 1.14            | 0.75            | 0.363                                 | 0.238  | 89                     |
|      | $y^{(3)}$ | 6.20            | -21.90          | 21.827                                | 14.631 | 1.49            | -2.83           | 0.394                                 | 13.743 | 55                     |
|      | $y^{(4)}$ | 11.98           | -41.93          | 50.547                                | 7.218  | 2.52            | -3.64           | 1.150                                 | 2.167  | 44                     |
|      | $y^{(5)}$ | 14.03           | -49.78          | 43.680                                | 10.175 | 3.05            | -5.31           | 1.511                                 | 3.278  | 29                     |
| 9    | $y^{(2)}$ | 0.27            | 4.30            | 29.859                                | 0.310  | 1.50            | -0.68           | 0.331                                 | 0.190  | 90                     |
|      | $y^{(3)}$ | 1.89            | -3.49           | 8.805                                 | 7.850  | 1.50            | -1.92           | 0.118                                 | 7.878  | 75                     |
|      | $y^{(4)}$ | 7.80            | -25.50          | 21.995                                | 5.158  | 2.30            | -3.23           | 0.477                                 | 3.688  | 46                     |
|      | $y^{(5)}$ | 6.89            | -21.79          | 25.654                                | 7.815  | 2.16            | -2.62           | 0.469                                 | 7.147  | 55                     |
| 10   | $y^{(2)}$ | -1.05           | 9.21            | 14.962                                | 1.194  | 1.44            | -0.86           | 0.240                                 | 0.741  | 62                     |
|      | $y^{(3)}$ | 0.18            | 5.82            | 48.831                                | 0.559  | 1.88            | -1.04           | 0.651                                 | 0.298  | 75                     |
|      | $y^{(4)}$ | 0.61            | 5.85            | 59.645                                | 0.348  | 2.52            | -1.88           | 0.823                                 | 0.050  | 72                     |
|      | $y^{(5)}$ | 8.66            | -23.22          | 99.961                                | 9.263  | 4.46            | -6.24           | 1.338                                 | 7.637  | 75                     |
| Mean | $y^{(2)}$ | 0.61            | 3.32            | 32.220                                | 3.128  | 1.55            | -0.47           | 0.430                                 | 1.986  | 82                     |
|      | $y^{(3)}$ | 2.83            | -4.24           | 50.471                                | 8.624  | 2.32            | -2.16           | 0.790                                 | 6.497  | 66                     |
|      | $y^{(4)}$ | 4.31            | -8.35           | 79.091                                | 11.589 | 3.08            | -3.35           | 1.436                                 | 6.187  | 63                     |
|      | $y^{(5)}$ | 6.18            | -15.49          | 87.301                                | 8.752  | 3.63            | -5.18           | 1.520                                 | 4.908  | 58                     |

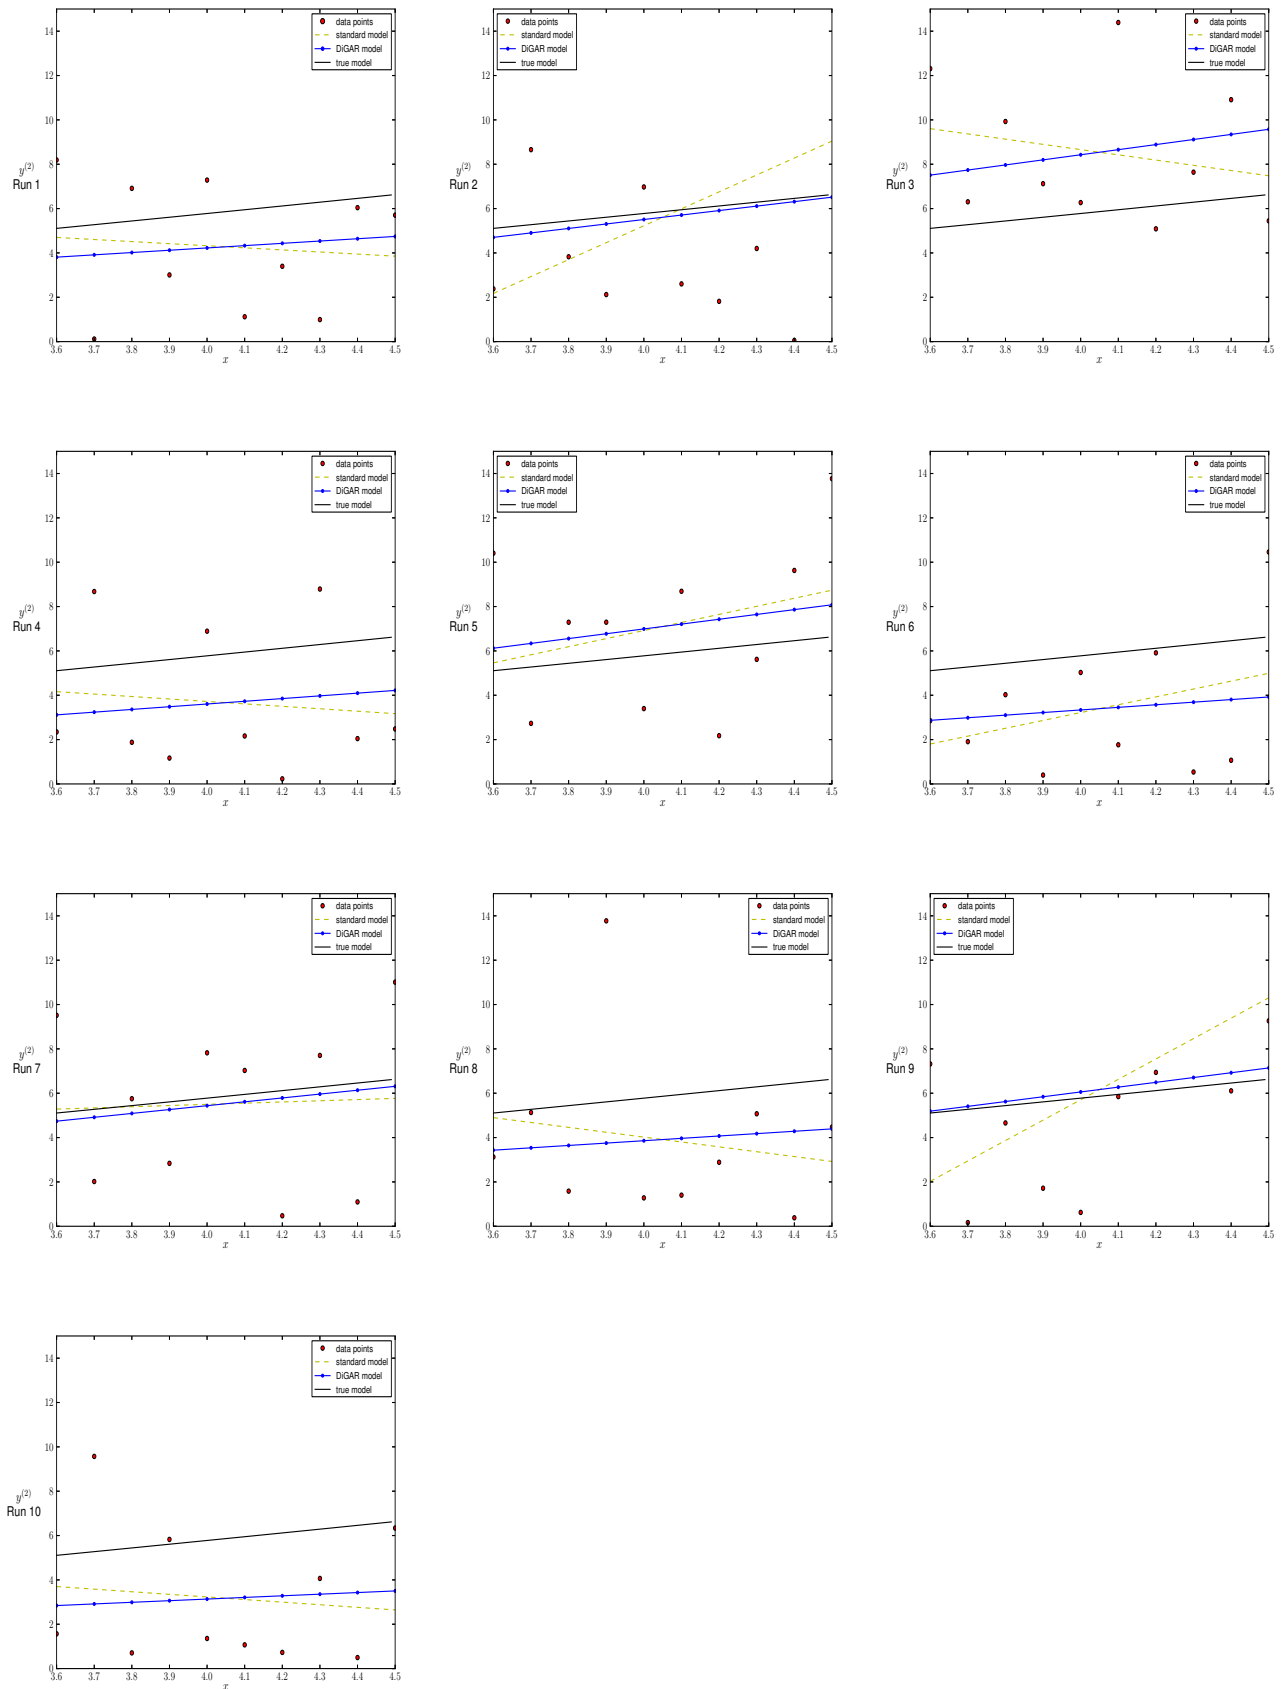

**Figure EC.1**  $M/M/1$  queue: fitted models vs. true model for  $y^{(2)}$ , 10 different runs, noting in particular that the standard model has the incorrect slope for graphs 1, 3, 4, 8, 10.

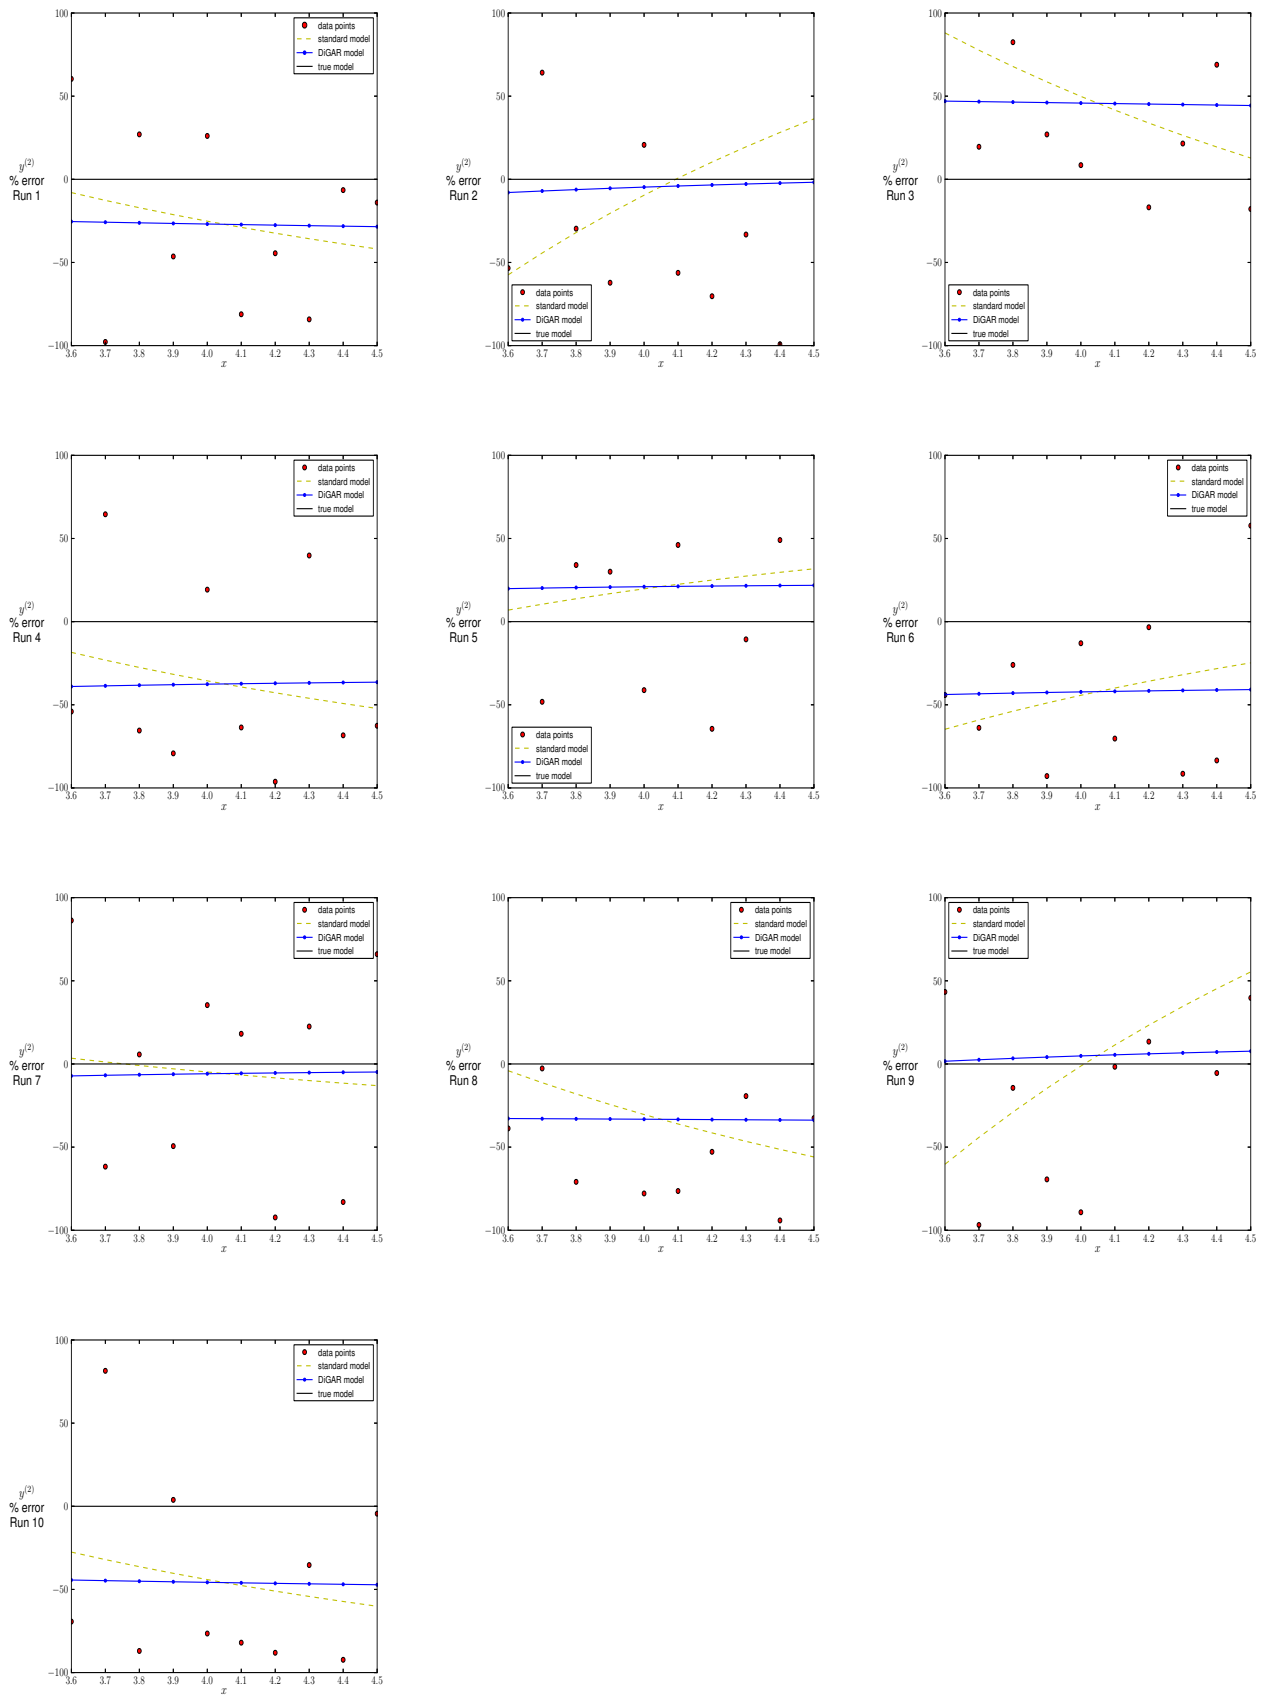

**Figure EC.2** Relative error of fitted models for  $y^{(2)}$ , 10 different runs.

**Table EC.4** Optimal value  $x^*$  obtained from each of the fitted functions (data set 1)

|           | $c = 1$   |          |       | $c \approx 27$ |          |       |
|-----------|-----------|----------|-------|----------------|----------|-------|
|           | true      | standard | DiGAR | true           | standard | DiGAR |
| $y^{(2)}$ | 0.88      | 4.0      | 2.5   | 4.00           | 4.0      | 4.1   |
| $y^{(3)}$ | 0.85      | 4.0      | 1.7   | 3.51           | 4.1      | 3.8   |
| $y^{(4)}$ | 0.87      | 0.4      | 7.8   | 3.43           | -119     | 0.6   |
| $y^{(5)}$ | 0.84      | 3.8      | 6.3   | 3.14           | 3.5      | 6.9   |
|           | $c = 100$ |          |       | $c = 500$      |          |       |
|           | true      | standard | DiGAR | true           | standard | DiGAR |
| $y^{(2)}$ | 7.38      | 4.2      | 5.2   | 16.04          | 4.7      | 5.9   |
| $y^{(3)}$ | 6.24      | 4.2      | 5.1   | 13.22          | 4.8      | 5.8   |
| $y^{(4)}$ | 5.88      | 8.2      | 5.6   | 11.94          | 6.4      | 6.0   |
| $y^{(5)}$ | 5.30      | 1.8      | 5.9   | 10.69          | 7.8      | 6.0   |

boxed entries indicate a maximum rather than a minimum

**Table EC.5** Optimal value  $x^*$  obtained from each of the fitted functions (data set 2)

|           | $c = 1$   |          |       | $c \approx 27$ |          |       |
|-----------|-----------|----------|-------|----------------|----------|-------|
|           | true      | standard | DiGAR | true           | standard | DiGAR |
| $y^{(2)}$ | 0.88      | 5.1      | 1.5   | 4.00           | 4.8      | 4.0   |
| $y^{(3)}$ | 0.85      | 7.4      | 1.2   | 3.51           | 9.9      | 3.7   |
| $y^{(4)}$ | 0.87      | 4.5      | 0.8   | 3.43           | 4.4      | 3.3   |
| $y^{(5)}$ | 0.84      | 7.8      | 2.2   | 3.14           | 9.8      | 3.4   |
|           | $c = 100$ |          |       | $c = 500$      |          |       |
|           | true      | standard | DiGAR | true           | standard | DiGAR |
| $y^{(2)}$ | 7.38      | 21.5     | 5.2   | 16.04          | 6.3      | 5.9   |
| $y^{(3)}$ | 6.24      | 5.1      | 5.1   | 13.22          | 5.9      | 5.8   |
| $y^{(4)}$ | 5.88      | 3.8      | 4.9   | 11.94          | 8.8      | 5.8   |
| $y^{(5)}$ | 5.30      | 4.3      | 4.6   | 10.69          | 5.9      | 5.7   |

boxed entries indicate a maximum rather than a minimum

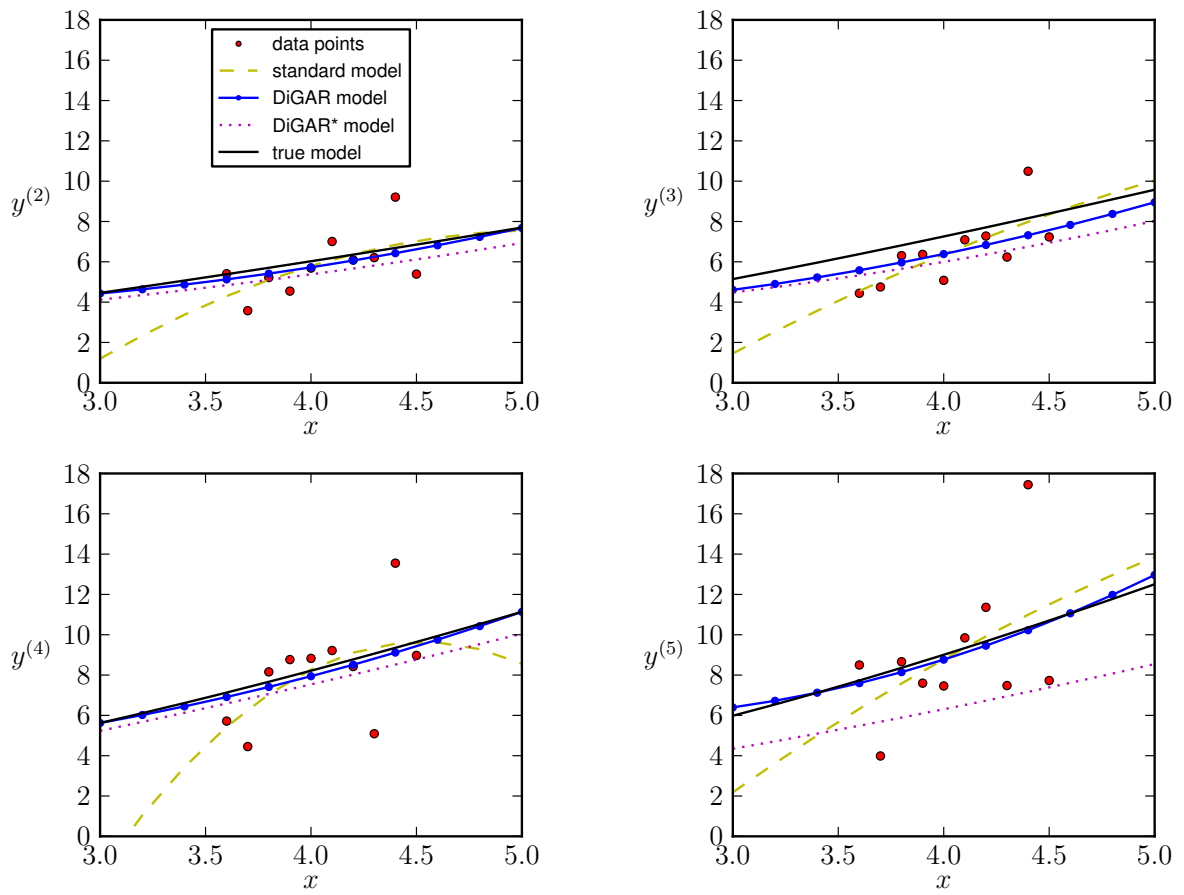

**Figure EC.3**  $M/M/1$  queue quadratic fit ( $c=1$ , 10 replications, data set 1).

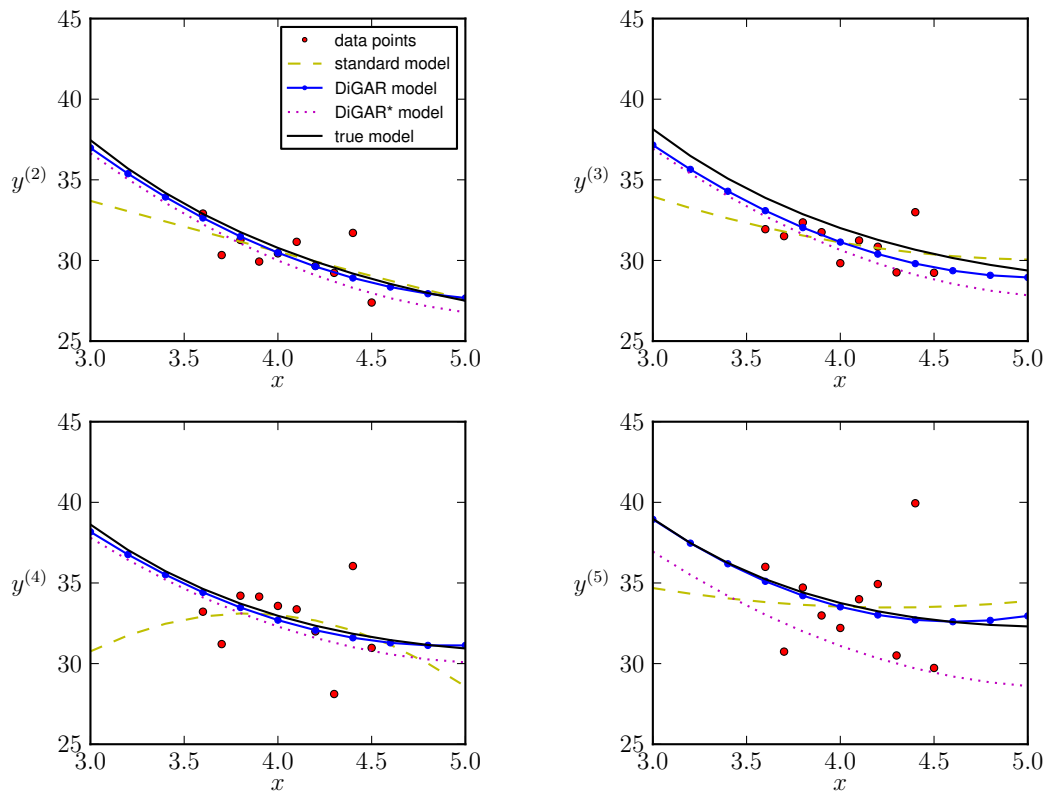

**Figure EC.4**  $M/M/1$  queue quadratic fit ( $c = 100$ , 10 replications, data set 1).

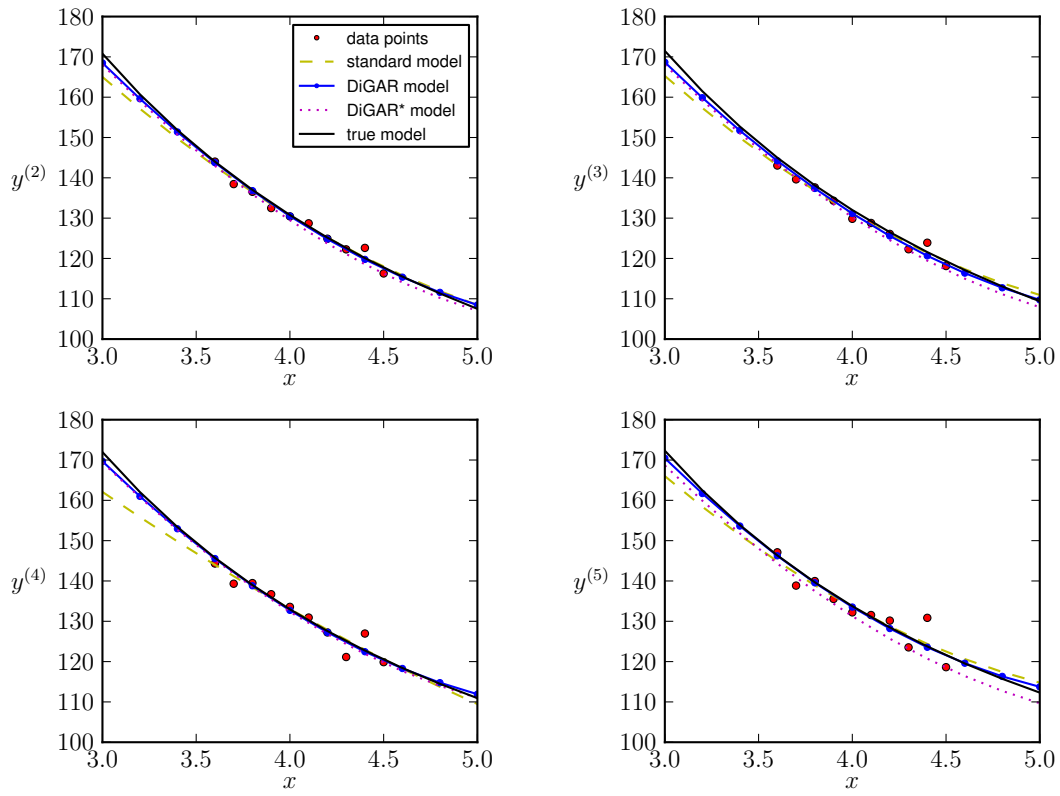

**Figure EC.5**  $M/M/1$  queue quadratic fit ( $c = 500$ , 10 replications, data set 1).

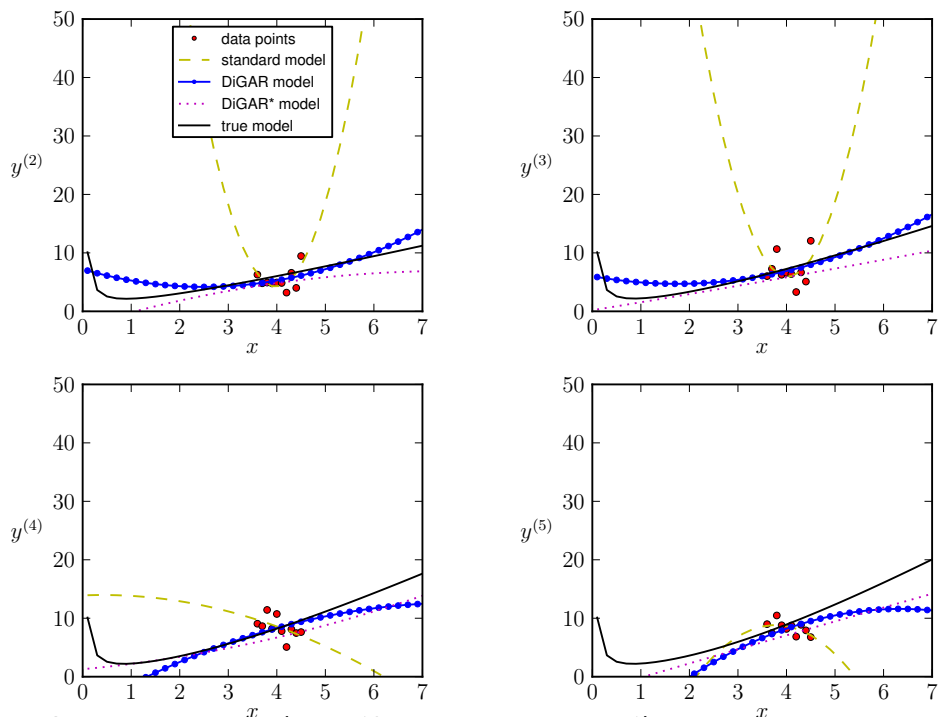

**Figure EC.6** Quadratic regression ( $c = 1$ , 10 replications, data set 1).

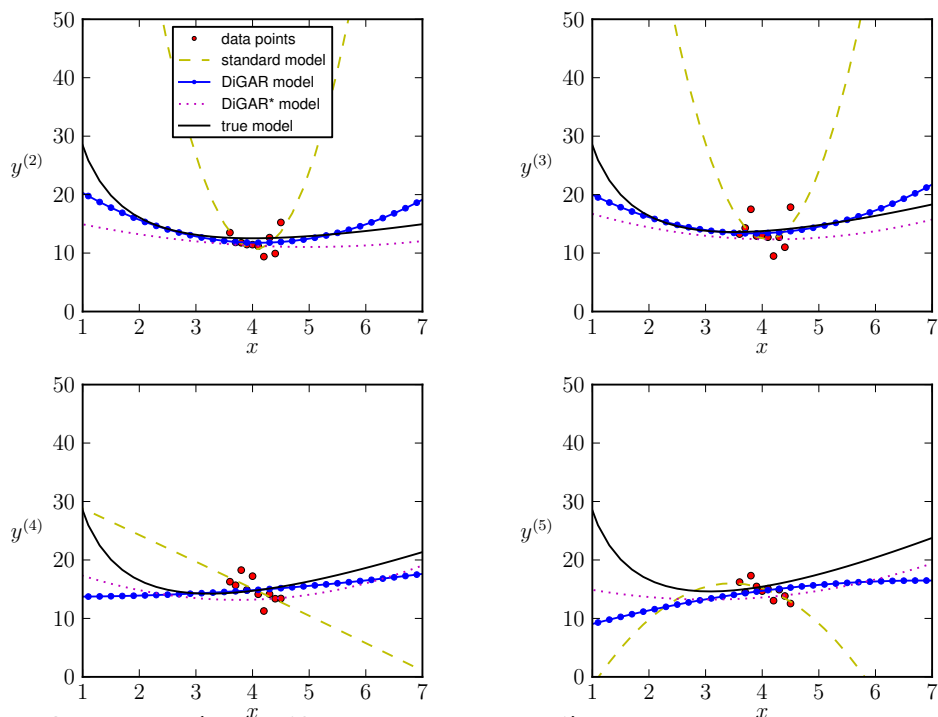

**Figure EC.7** Quadratic fit ( $c \approx 27$ , 10 replications, data set 1).

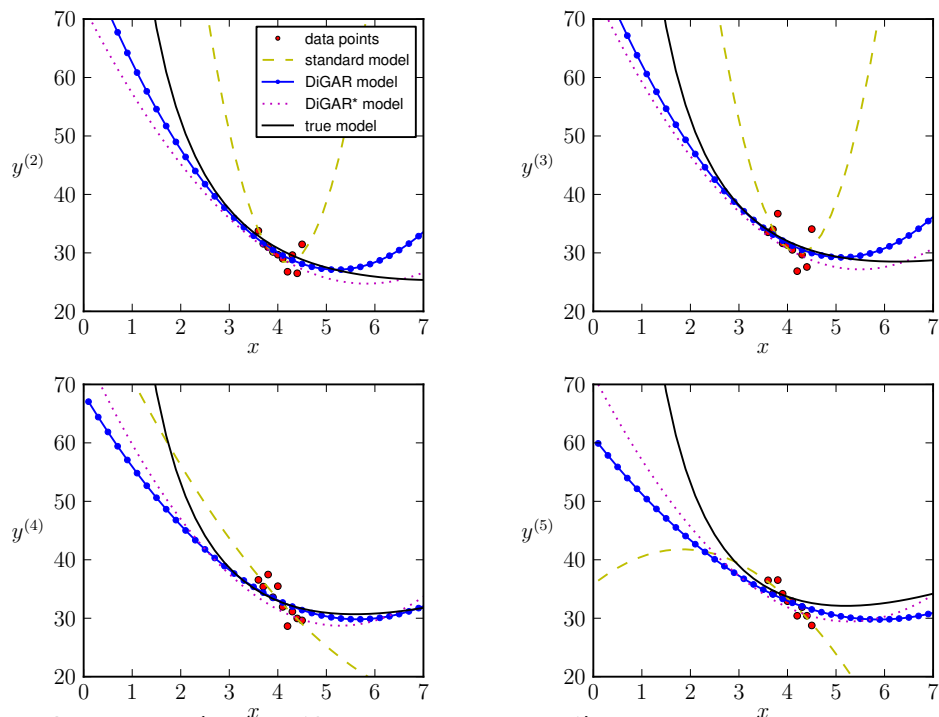

**Figure EC.8** Quadratic fit ( $c = \overset{x}{100}$ , 10 replications, data set 1).

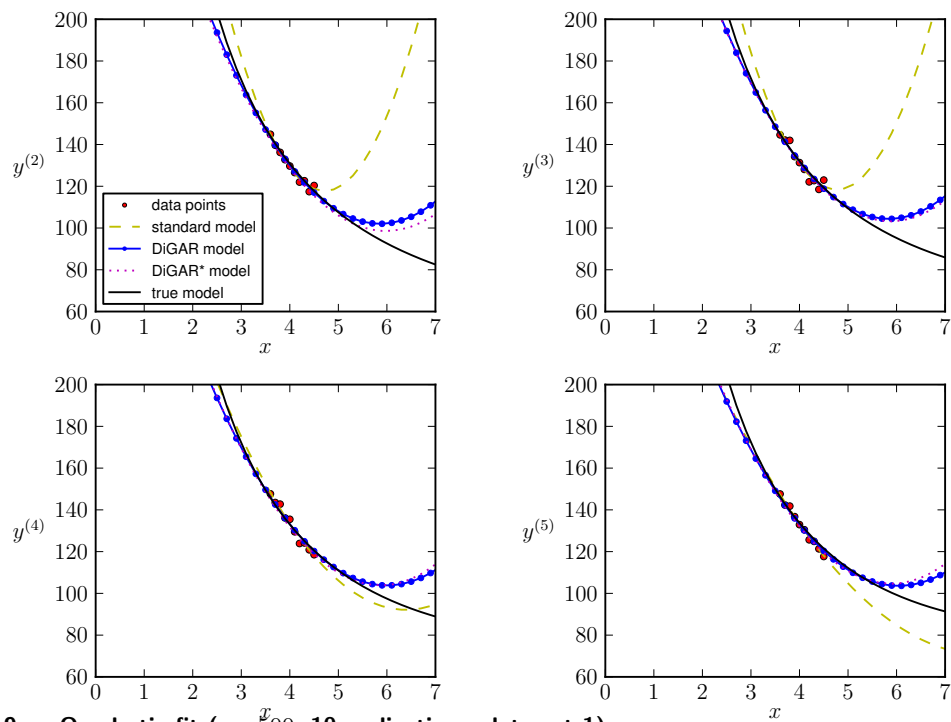

**Figure EC.9** Quadratic fit ( $c = \overset{x}{500}$ , 10 replications, data set 1).

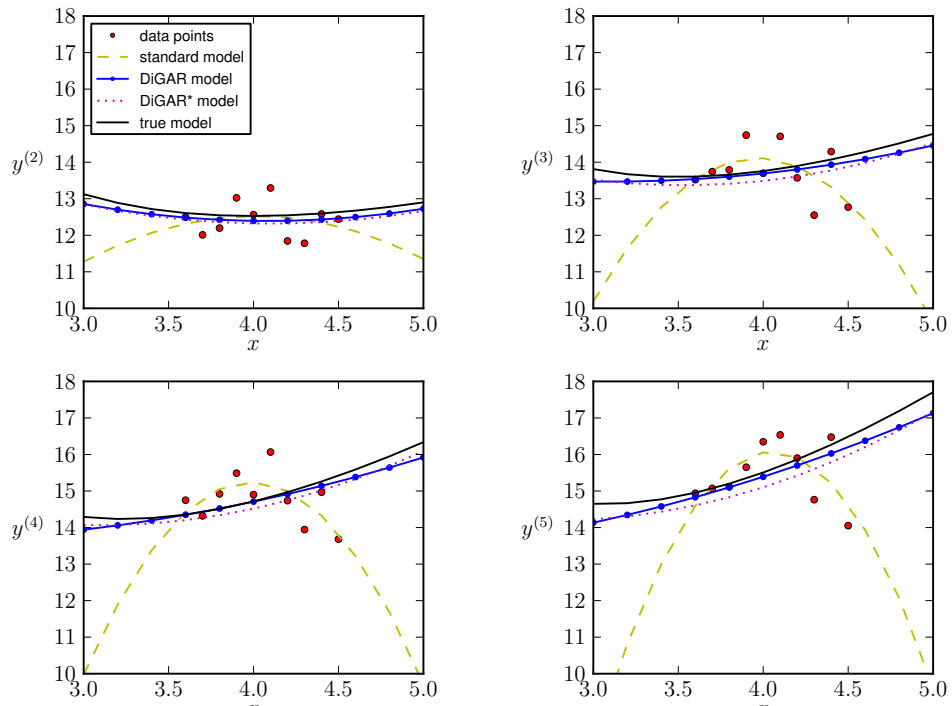

**Figure EC.10** Quadratic fit ( $c \approx 27$ , 100 replications).

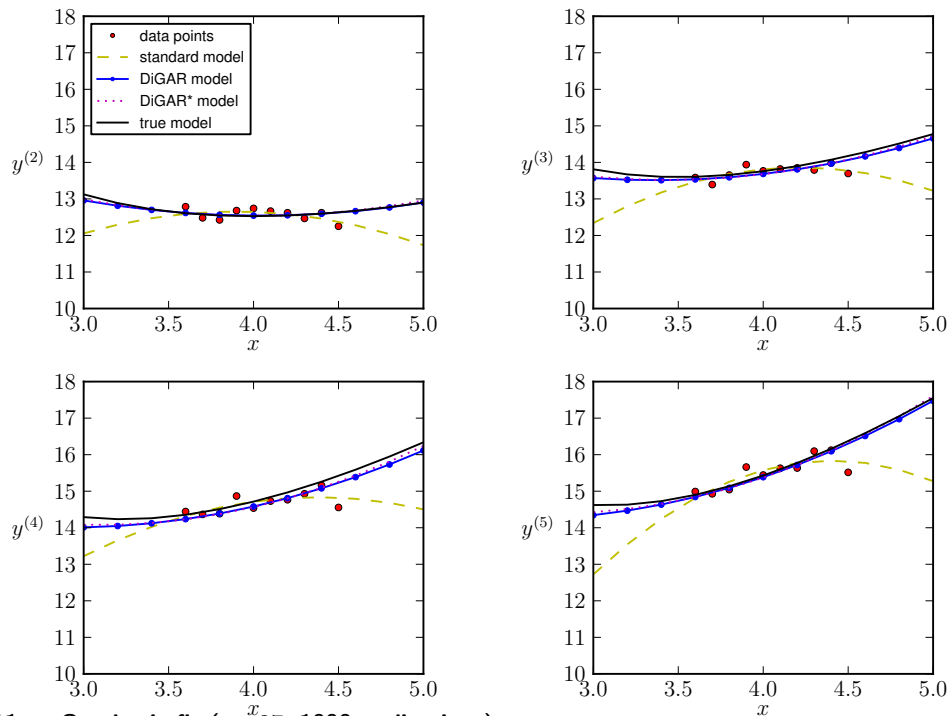

**Figure EC.11** Quadratic fit ( $c \approx 27$ , 1000 replications).

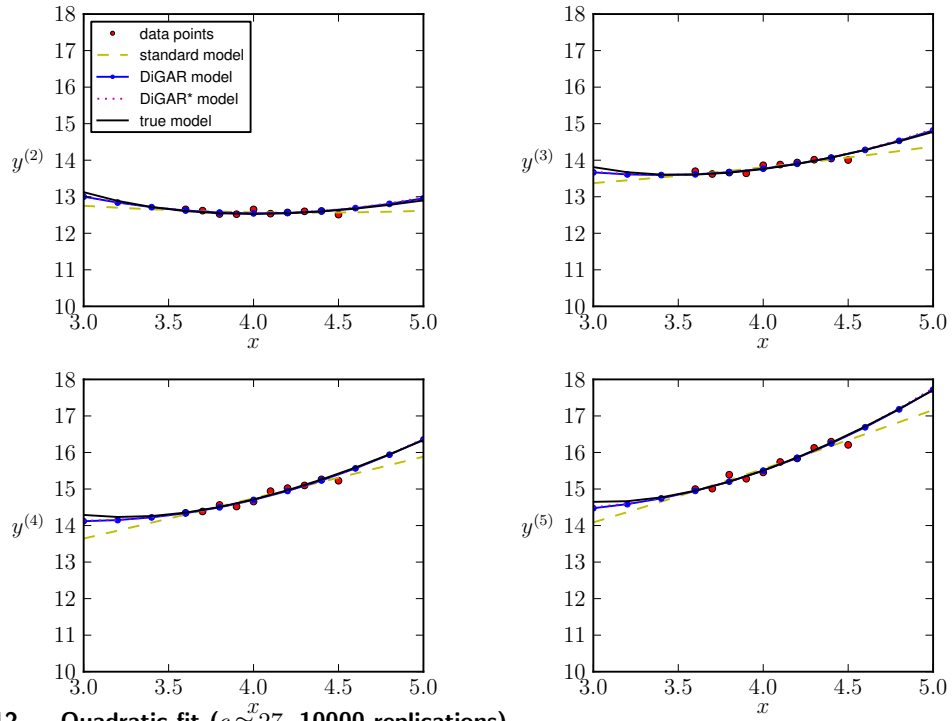

**Figure EC.12** Quadratic fit ( $c \approx \tilde{x} 27$ , 10000 replications).

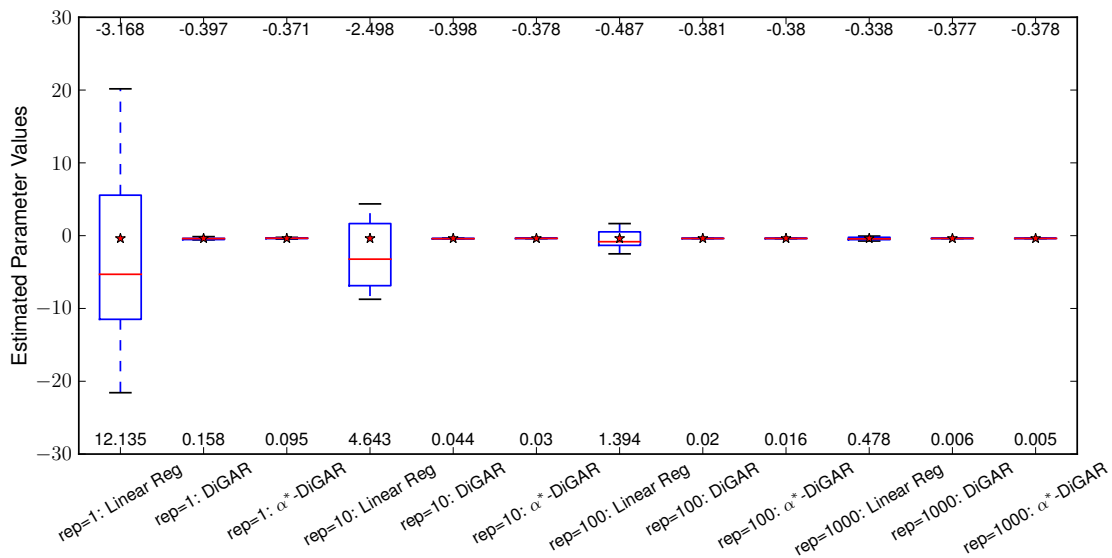

**Figure EC.13**  $U/U/1$  queue box plots of  $\beta_1$  for  $y^{(2)}$  w.r.t. # reps/design point (sample mean at top, sample standard deviation at bottom, true  $\beta_1 = -0.375$ )

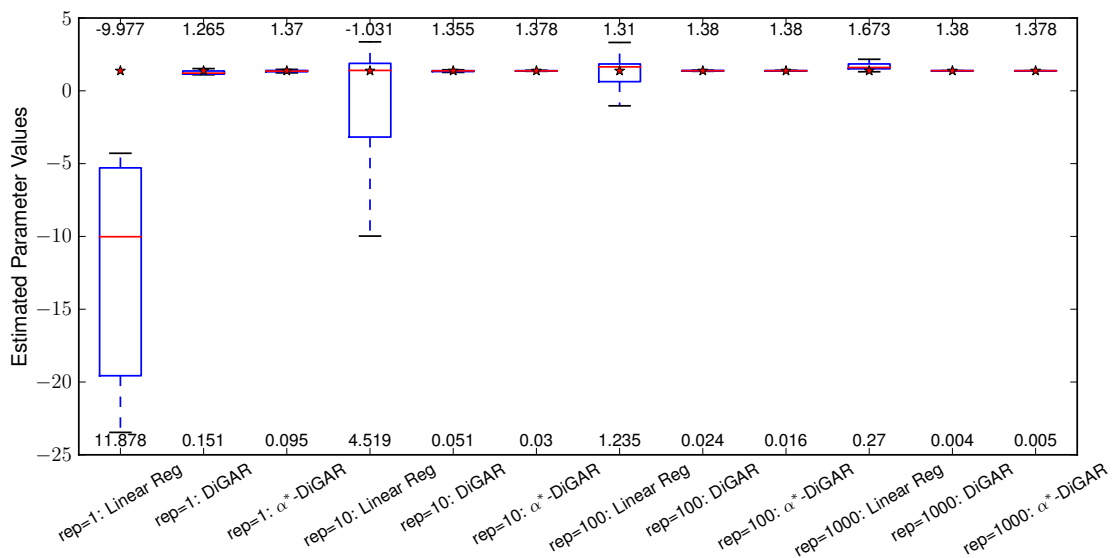

**Figure EC.14**  $U/U/1$  queue box plots of  $\beta_2$  for  $y^{(2)}$  w.r.t. # reps/design point (sample mean at top, sample standard deviation at bottom, true  $\beta_2 = 1.375$ )

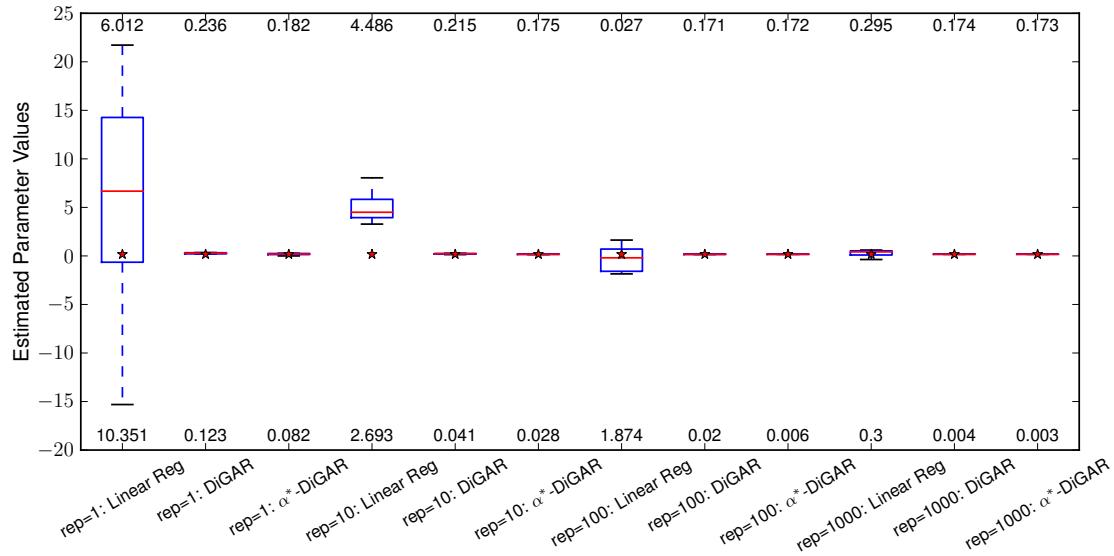

Figure EC.15  $U/U/1$  queue box plots of  $\beta_3$  for  $y^{(2)}$  w.r.t. # reps/design point (sample mean at top, sample standard deviation at bottom, true  $\beta_3 = 0.171$ )

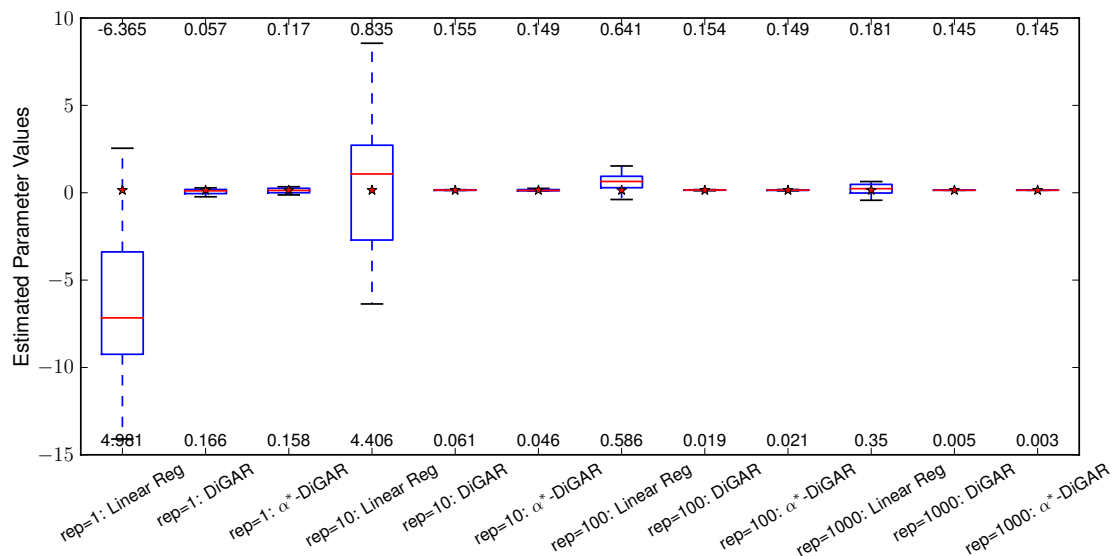

Figure EC.16  $U/U/1$  queue box plots of  $\beta_4$  for  $y^{(2)}$  w.r.t. # reps/design point (sample mean at top, sample standard deviation at bottom, true  $\beta_4 = 0.146$ )

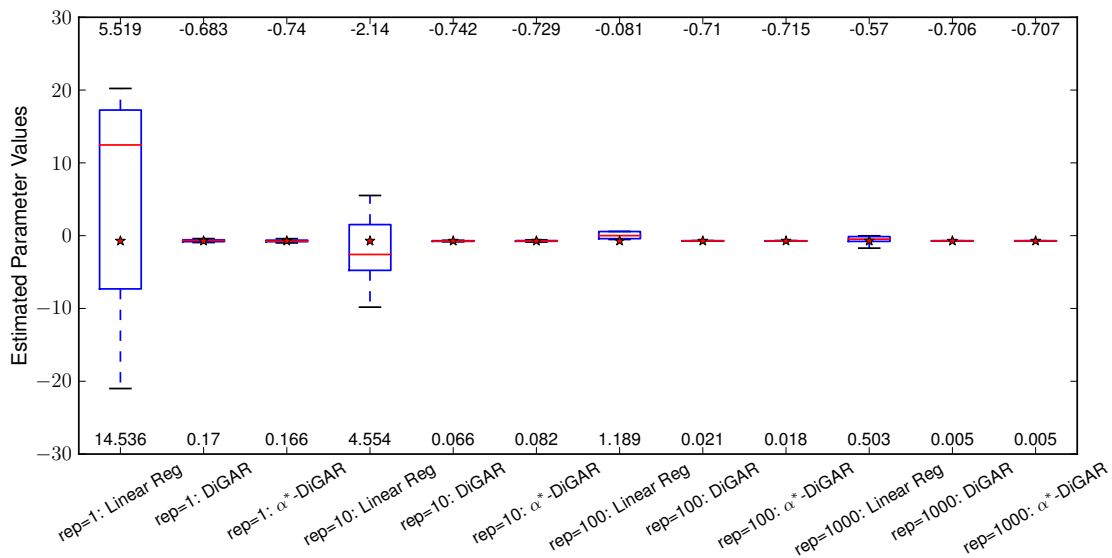

**Figure EC.17**  $U/U/1$  queue box plots of  $\beta_1$  for  $y^{(3)}$  w.r.t. # reps/design point (sample mean at top, sample standard deviation at bottom, true  $\beta_1 = -0.720$ )

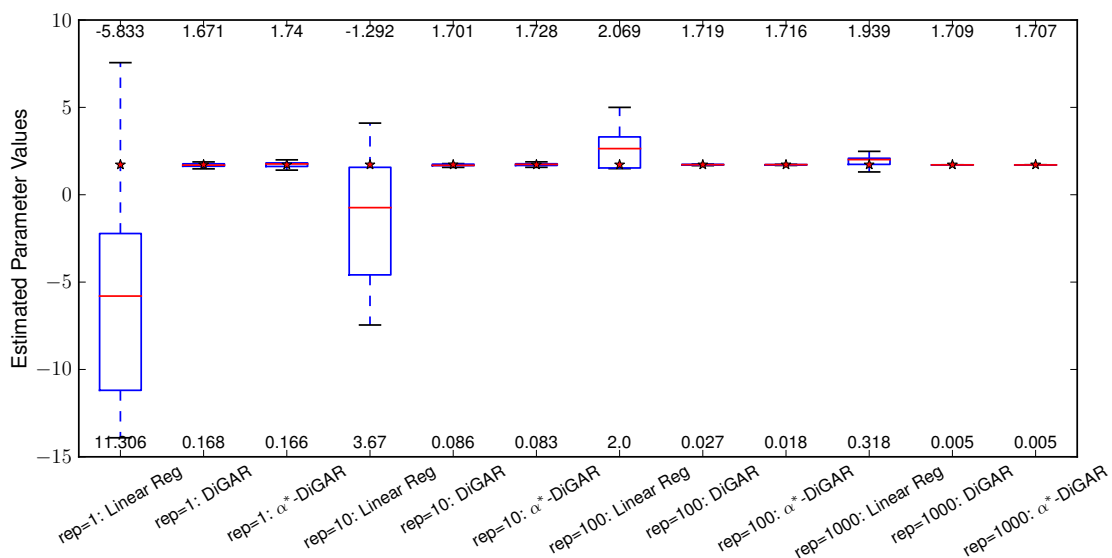

**Figure EC.18**  $U/U/1$  queue box plots of  $\beta_2$  for  $y^{(3)}$  w.r.t. # reps/design point (sample mean at top, sample standard deviation at bottom, true  $\beta_2 = 1.720$ )

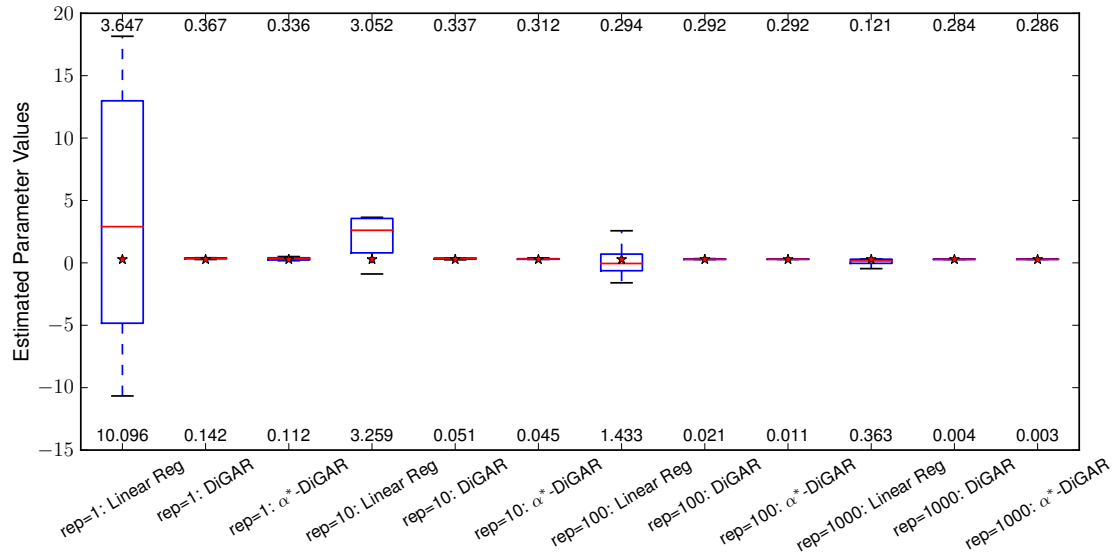

Figure EC.19  $U/U/1$  queue box plots of  $\beta_3$  for  $y^{(3)}$  w.r.t. # reps/design point (sample mean at top, sample standard deviation at bottom, true  $\beta_3 = 0.279$ )

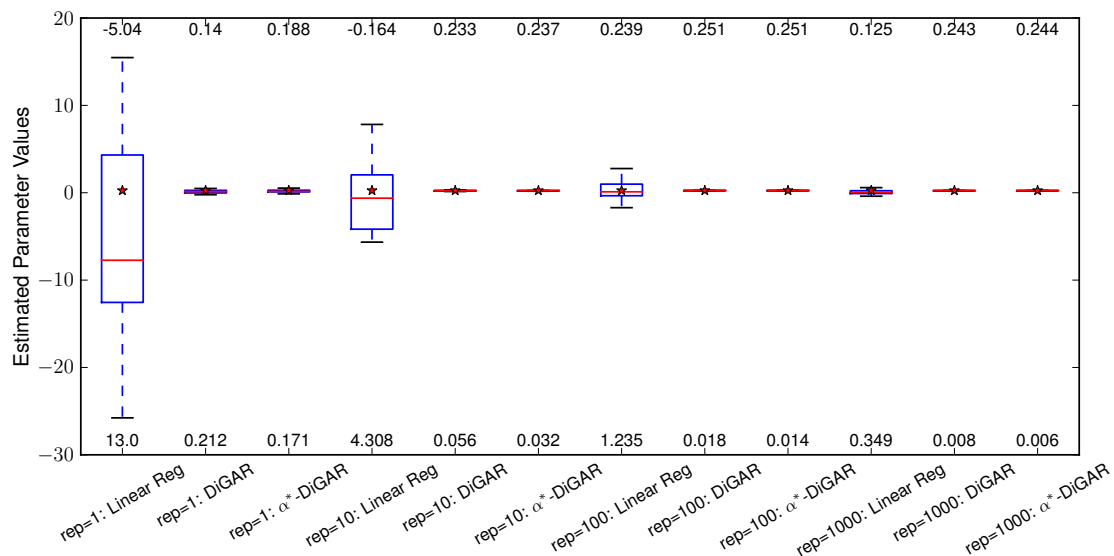

Figure EC.20  $U/U/1$  queue box plots of  $\beta_4$  for  $y^{(3)}$  w.r.t. # reps/design point (sample mean at top, sample standard deviation at bottom, true  $\beta_4 = 0.255$ )

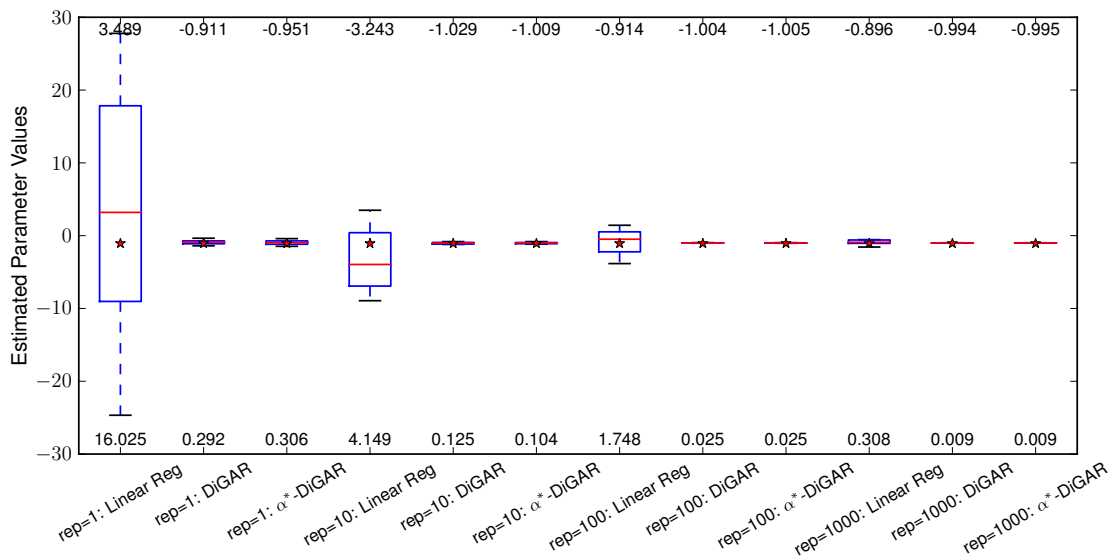

**Figure EC.21**  $U/U/1$  queue box plots of  $\beta_1$  for  $y^{(4)}$  w.r.t. # reps/design point (sample mean at top, sample standard deviation at bottom, true  $\beta_1 = -1.065$ )

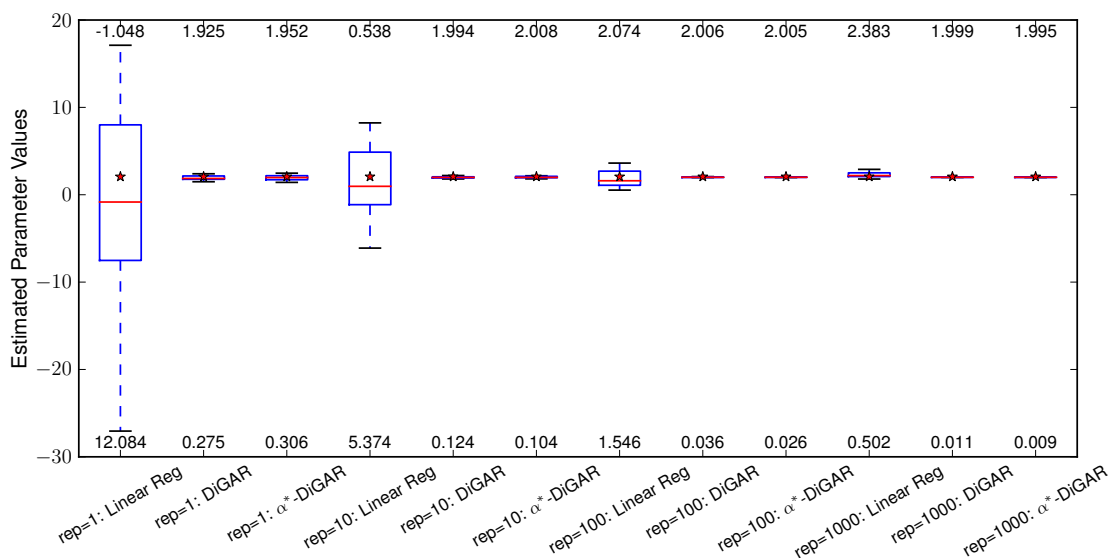

**Figure EC.22**  $U/U/1$  queue box plots of  $\beta_2$  for  $y^{(4)}$  w.r.t. # reps/design point (sample mean at top, sample standard deviation at bottom, true  $\beta_2 = 2.065$ )

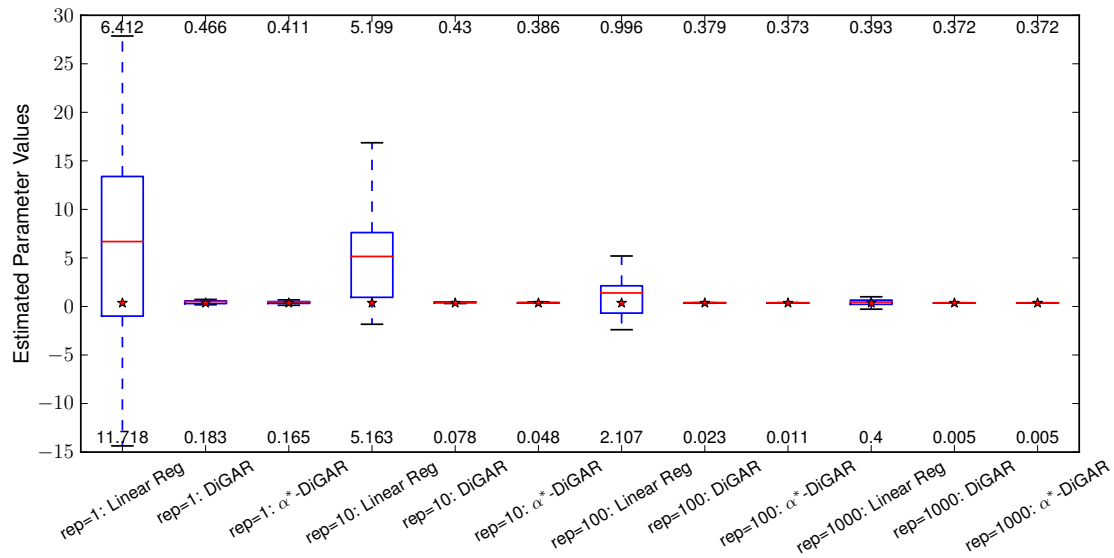

Figure EC.23  $U/U/1$  queue box plots of  $\beta_3$  for  $y^{(4)}$  w.r.t. # reps/design point (sample mean at top, sample standard deviation at bottom, true  $\beta_3 = 0.362$ )

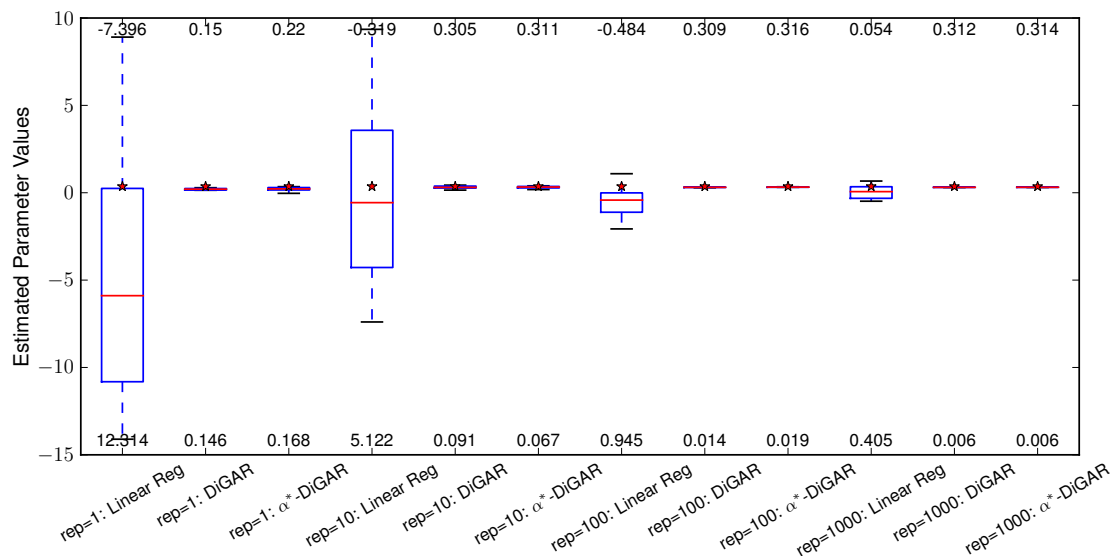

Figure EC.24  $U/U/1$  queue box plots of  $\beta_4$  for  $y^{(4)}$  w.r.t. # reps/design point (sample mean at top, sample standard deviation at bottom, true  $\beta_4 = 0.360$ )

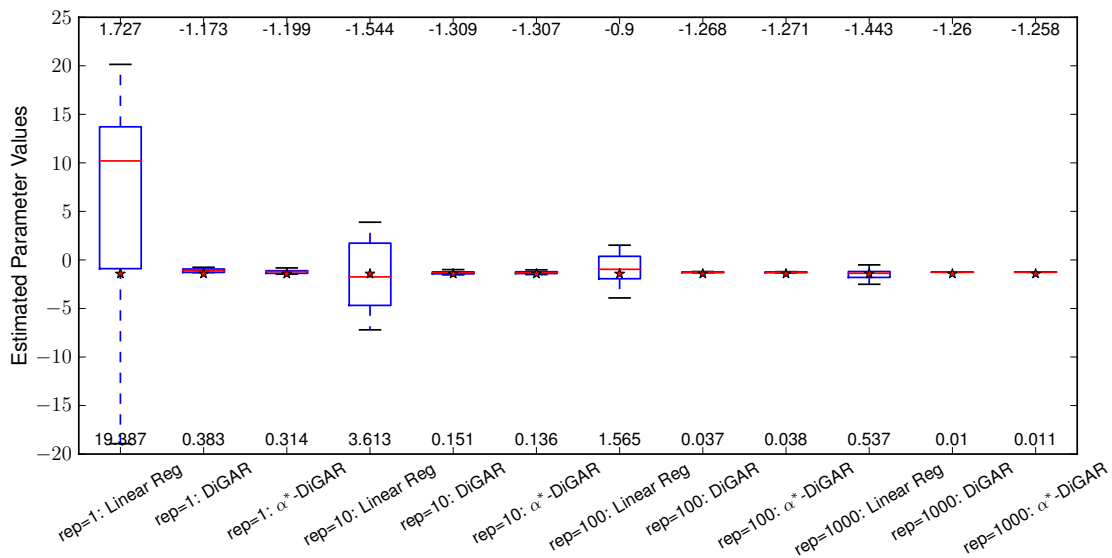

**Figure EC.25**  $U/U/1$  queue box plots of  $\beta_1$  for  $y^{(5)}$  w.r.t. # reps/design point (sample mean at top, sample standard deviation at bottom, true  $\beta_1 = -1.427$ )

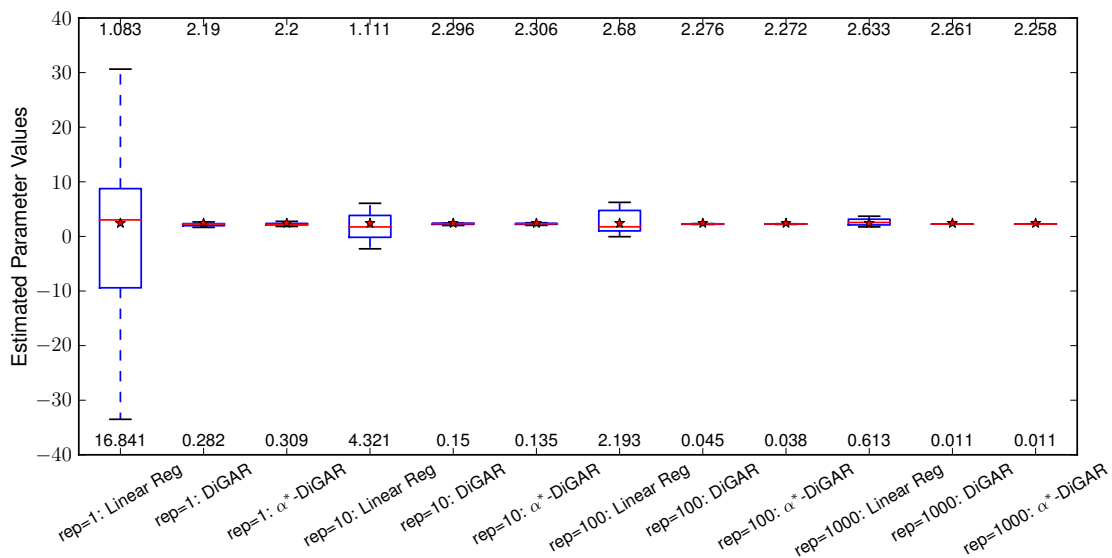

**Figure EC.26**  $U/U/1$  queue box plots of  $\beta_2$  for  $y^{(5)}$  w.r.t. # reps/design point (sample mean at top, sample standard deviation at bottom, true  $\beta_2 = 2.427$ )

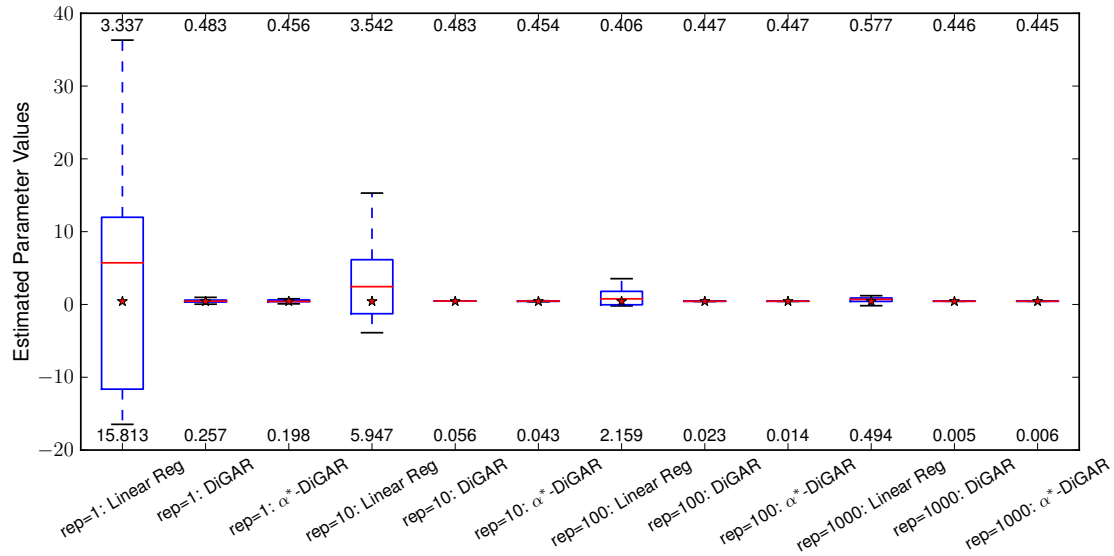

Figure EC.27  $U/U/1$  queue box plots of  $\beta_3$  for  $y^{(5)}$  w.r.t. # reps/design point (sample mean at top, sample standard deviation at bottom, true  $\beta_3 = 0.431$ )

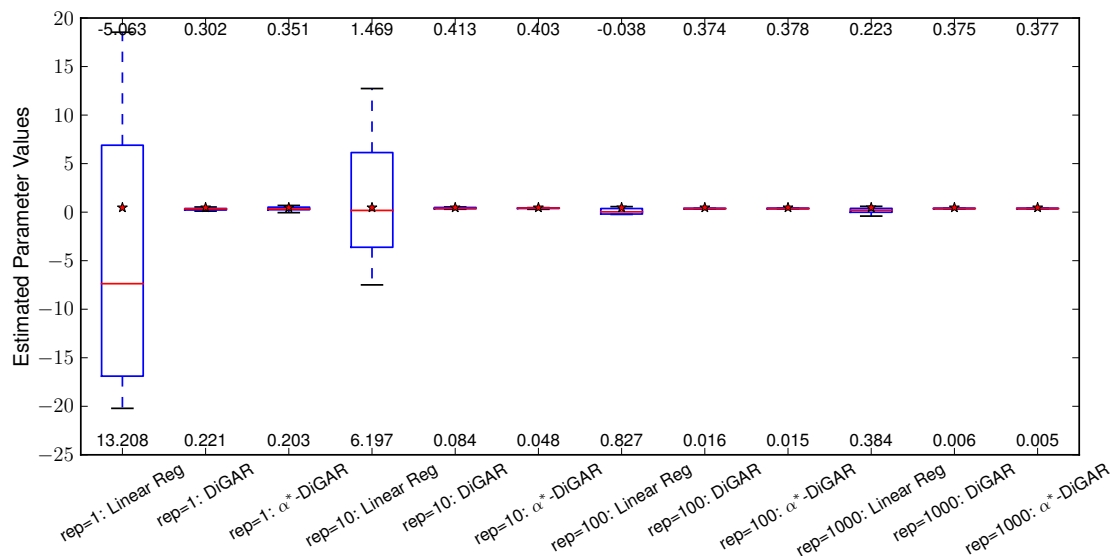

Figure EC.28  $U/U/1$  queue box plots of  $\beta_4$  for  $y^{(5)}$  w.r.t. # reps/design point (sample mean at top, sample standard deviation at bottom, true  $\beta_4 = 0.467$ )

## EC.6. More Details on the Sphere Function Example

An example of the covariance matrix  $\Sigma$  at the low correlation level  $\rho = 0.2$  is the following:

$$\Sigma = \begin{pmatrix} 10.0 & 2.83 & 3.64 & 4.00 & 4.47 \\ 2.83 & 20.0 & 4.90 & 5.66 & 6.32 \\ 3.64 & 4.90 & 30.0 & 6.93 & 7.75 \\ 4.00 & 5.66 & 6.93 & 40.0 & 8.94 \\ 4.47 & 6.32 & 7.75 & 8.94 & 50.0 \end{pmatrix}.$$

**Table EC.6** Parameter estimates and performance metrics for the sphere function for two-level full factorial centered design around  $(1, -0.6, 0.8, -0.5)$ ; 10 replication per design point, gridsize 0.5, 1000 macroreplications.

| correlation             |                 | true value | Linear Regression |       | DiGAR  |       | $\alpha^*$ -DiGAR |       |
|-------------------------|-----------------|------------|-------------------|-------|--------|-------|-------------------|-------|
|                         |                 |            | value             | MSE   | value  | MSE   | value             | MSE   |
| low<br>$\rho = -0.2$    | $\hat{\beta}_1$ | 2.0        | 2.029             | 0.263 | 2.015  | 0.090 | 2.017             | 0.081 |
|                         | $\hat{\beta}_2$ | -1.2       | -1.171            | 0.262 | -1.215 | 0.131 | -1.203            | 0.107 |
|                         | $\hat{\beta}_3$ | 1.6        | 1.588             | 0.257 | 1.609  | 0.165 | 1.601             | 0.128 |
|                         | $\hat{\beta}_4$ | -1.0       | -0.996            | 0.250 | -0.967 | 0.216 | -0.979            | 0.139 |
| medium<br>$\rho = -0.5$ | $\hat{\beta}_1$ | 2.0        | 1.997             | 0.515 | 1.998  | 0.139 | 1.998             | 0.138 |
|                         | $\hat{\beta}_2$ | -1.2       | -1.227            | 0.535 | -1.198 | 0.190 | -1.206            | 0.181 |
|                         | $\hat{\beta}_3$ | 1.6        | 1.583             | 0.516 | 1.596  | 0.206 | 1.591             | 0.190 |
|                         | $\hat{\beta}_4$ | -1.0       | -0.976            | 0.536 | -0.998 | 0.247 | -0.989            | 0.218 |
| high<br>$\rho = -0.8$   | $\hat{\beta}_1$ | 2.0        | 2.009             | 0.656 | 2.013  | 0.194 | 2.012             | 0.187 |
|                         | $\hat{\beta}_2$ | -1.2       | -1.206            | 0.680 | -1.198 | 0.242 | -1.200            | 0.239 |
|                         | $\hat{\beta}_3$ | 1.6        | 1.609             | 0.724 | 1.605  | 0.261 | 1.606             | 0.262 |
|                         | $\hat{\beta}_4$ | -1.0       | -0.939            | 0.695 | -0.961 | 0.325 | -0.952            | 0.309 |

**Table EC.7** Parameter estimates and performance metrics for the sphere function for two-level full factorial centered design around  $(1, -0.6, 0.8, -0.5)$ ; 10 replication per design point, gridsize 0.05, 1000 macroreplications.

| correlation             |                 | true value | Linear Regression |        | DiGAR  |       | $\alpha^*$ -DiGAR |       |
|-------------------------|-----------------|------------|-------------------|--------|--------|-------|-------------------|-------|
|                         |                 |            | value             | MSE    | value  | MSE   | value             | MSE   |
| low<br>$\rho = -0.2$    | $\hat{\beta}_1$ | 2.0        | 1.953             | 24.775 | 2.002  | 0.111 | 2.002             | 0.111 |
|                         | $\hat{\beta}_2$ | -1.2       | -1.352            | 25.365 | -1.188 | 0.173 | -1.189            | 0.172 |
|                         | $\hat{\beta}_3$ | 1.6        | 1.503             | 26.140 | 1.589  | 0.218 | 1.588             | 0.218 |
|                         | $\hat{\beta}_4$ | -1.0       | -1.068            | 26.955 | -1.009 | 0.291 | -1.010            | 0.290 |
| medium<br>$\rho = -0.5$ | $\hat{\beta}_1$ | 2.0        | 1.947             | 55.213 | 2.035  | 0.179 | 2.035             | 0.180 |
|                         | $\hat{\beta}_2$ | -1.2       | -1.217            | 54.511 | -1.206 | 0.241 | -1.206            | 0.242 |
|                         | $\hat{\beta}_3$ | 1.6        | 1.642             | 51.917 | 1.603  | 0.291 | 1.603             | 0.293 |
|                         | $\hat{\beta}_4$ | -1.0       | -0.860            | 50.657 | -1.022 | 0.334 | -1.021            | 0.337 |
| high<br>$\rho = -0.8$   | $\hat{\beta}_1$ | 2.0        | 1.714             | 71.059 | 1.977  | 0.270 | 1.977             | 0.271 |
|                         | $\hat{\beta}_2$ | -1.2       | -0.688            | 72.366 | -1.187 | 0.310 | -1.185            | 0.310 |
|                         | $\hat{\beta}_3$ | 1.6        | 1.493             | 70.225 | 1.589  | 0.354 | 1.589             | 0.356 |
|                         | $\hat{\beta}_4$ | -1.0       | -1.302            | 70.437 | -0.996 | 0.455 | -0.999            | 0.451 |
